# Supplementary material for: Environmental DNA from plastic and textile marine litter detects exotic and nuisance species nearby ports
Source: PubMed Central journal article supplement (PMC7302909; doi:10.1371/journal.pone.0228811), 2020-06-18
Supplement: pone.0228811.s004.pdf [file pone.0228811.s004.pdf]

# PLOS ONE

## Plastic and textile marine litter as reservoirs for secondary species dispersal from ports

--Manuscript Draft--

|                                                                                                                                                                                                                                                                                                                                                                                                                                                                                              |                                                                                                                                                                                                                                                                                                                                                                                                                                                                                                                                                                                                                                                                                                                                                                                                                                                                                                                                                                                                                                                                                                                                                                                                                                                                                                                                     |
|----------------------------------------------------------------------------------------------------------------------------------------------------------------------------------------------------------------------------------------------------------------------------------------------------------------------------------------------------------------------------------------------------------------------------------------------------------------------------------------------|-------------------------------------------------------------------------------------------------------------------------------------------------------------------------------------------------------------------------------------------------------------------------------------------------------------------------------------------------------------------------------------------------------------------------------------------------------------------------------------------------------------------------------------------------------------------------------------------------------------------------------------------------------------------------------------------------------------------------------------------------------------------------------------------------------------------------------------------------------------------------------------------------------------------------------------------------------------------------------------------------------------------------------------------------------------------------------------------------------------------------------------------------------------------------------------------------------------------------------------------------------------------------------------------------------------------------------------|
| <b>Manuscript Number:</b>                                                                                                                                                                                                                                                                                                                                                                                                                                                                    | PONE-D-19-21907                                                                                                                                                                                                                                                                                                                                                                                                                                                                                                                                                                                                                                                                                                                                                                                                                                                                                                                                                                                                                                                                                                                                                                                                                                                                                                                     |
| <b>Article Type:</b>                                                                                                                                                                                                                                                                                                                                                                                                                                                                         | Research Article                                                                                                                                                                                                                                                                                                                                                                                                                                                                                                                                                                                                                                                                                                                                                                                                                                                                                                                                                                                                                                                                                                                                                                                                                                                                                                                    |
| <b>Full Title:</b>                                                                                                                                                                                                                                                                                                                                                                                                                                                                           | Plastic and textile marine litter as reservoirs for secondary species dispersal from ports                                                                                                                                                                                                                                                                                                                                                                                                                                                                                                                                                                                                                                                                                                                                                                                                                                                                                                                                                                                                                                                                                                                                                                                                                                          |
| <b>Short Title:</b>                                                                                                                                                                                                                                                                                                                                                                                                                                                                          | Plastic and textile marine litter as reservoirs for secondary species dispersal                                                                                                                                                                                                                                                                                                                                                                                                                                                                                                                                                                                                                                                                                                                                                                                                                                                                                                                                                                                                                                                                                                                                                                                                                                                     |
| <b>Corresponding Author:</b>                                                                                                                                                                                                                                                                                                                                                                                                                                                                 | Aitor Ibabe Arrieta, M.D<br>Universidad de Oviedo Facultad de Medicina y Ciencias de la Salud<br>Oviedo, SPAIN                                                                                                                                                                                                                                                                                                                                                                                                                                                                                                                                                                                                                                                                                                                                                                                                                                                                                                                                                                                                                                                                                                                                                                                                                      |
| <b>Keywords:</b>                                                                                                                                                                                                                                                                                                                                                                                                                                                                             | Marine debris; Biofilm; Next Generation Sequencing; Nonindigenous species                                                                                                                                                                                                                                                                                                                                                                                                                                                                                                                                                                                                                                                                                                                                                                                                                                                                                                                                                                                                                                                                                                                                                                                                                                                           |
| <b>Abstract:</b>                                                                                                                                                                                                                                                                                                                                                                                                                                                                             | Marine debris is nowadays an important source of environmental and economic problems. Floating litter can be employed by marine organisms as a surface to attach and use as spreading vector. In this way, human activities are promoting expansions of potentially harmful species into novel ecosystems, putting in danger the autochthonous communities. In this project, more than 1,000 litter items were collected and classified from five beaches eastwards the port of Gijón, in Asturias, Spain. Next generation sequencing was employed to study the communities occurring in biofilm attached to items of different materials. A dominance of DNA from Florideophyceans, Dinophyceans and Arthropods was found, and four non-indigenous species were identified. Results showed a clear preference of Florideophyceans and Bryozoans to attach on textile surfaces versus plastic ones. Considering that these taxa contain several highly invasive species described to date, these data emphasize the potential of textile marine debris as a vector for dispersal of alien species. Moreover, the litter macrofauna profile was more similar with port's macrofauna in closer beaches than in farther ones, confirming that both plastic and textile marine litter can be a vector for species dispersal from ports. |
| <b>Order of Authors:</b>                                                                                                                                                                                                                                                                                                                                                                                                                                                                     | Aitor Ibabe Arrieta, M.D<br>Fernando Rayón<br>Jose Luis Martinez<br>Eva Garcia-Vazquez                                                                                                                                                                                                                                                                                                                                                                                                                                                                                                                                                                                                                                                                                                                                                                                                                                                                                                                                                                                                                                                                                                                                                                                                                                              |
| <b>Additional Information:</b>                                                                                                                                                                                                                                                                                                                                                                                                                                                               |                                                                                                                                                                                                                                                                                                                                                                                                                                                                                                                                                                                                                                                                                                                                                                                                                                                                                                                                                                                                                                                                                                                                                                                                                                                                                                                                     |
| <b>Question</b>                                                                                                                                                                                                                                                                                                                                                                                                                                                                              | <b>Response</b>                                                                                                                                                                                                                                                                                                                                                                                                                                                                                                                                                                                                                                                                                                                                                                                                                                                                                                                                                                                                                                                                                                                                                                                                                                                                                                                     |
| <b>Financial Disclosure</b><br><br>Enter a financial disclosure statement that describes the sources of funding for the work included in this submission. Review the <a href="#">submission guidelines</a> for detailed requirements. View published research articles from <a href="#">PLOS ONE</a> for specific examples.<br><br>This statement is required for submission and <b>will appear in the published article</b> if the submission is accepted. Please make sure it is accurate. | This study was funded by the Spanish Ministry of Economy and Competitiveness, Grant CGL-2016-79209-R.                                                                                                                                                                                                                                                                                                                                                                                                                                                                                                                                                                                                                                                                                                                                                                                                                                                                                                                                                                                                                                                                                                                                                                                                                               |

**Unfunded studies**

Enter: *The author(s) received no specific funding for this work.*

**Funded studies**

Enter a statement with the following details:

- Initials of the authors who received each award
- Grant numbers awarded to each author
- The full name of each funder
- URL of each funder website
- Did the sponsors or funders play any role in the study design, data collection and analysis, decision to publish, or preparation of the manuscript?
- **NO** - Include this sentence at the end of your statement: *The funders had no role in study design, data collection and analysis, decision to publish, or preparation of the manuscript.*
- **YES** - Specify the role(s) played.

\* typeset

**Competing Interests**

Use the instructions below to enter a competing interest statement for this submission. On behalf of all authors, disclose any [competing interests](#) that could be perceived to bias this work—acknowledging all financial support and any other relevant financial or non-financial competing interests.

This statement **will appear in the published article** if the submission is accepted. Please make sure it is accurate. View published research articles from [PLOS ONE](#) for specific examples.

The authors have declared that no competing interests exist.

**NO authors have competing interests**

Enter: *The authors have declared that no competing interests exist.*

**Authors with competing interests**

Enter competing interest details beginning with this statement:

*I have read the journal's policy and the authors of this manuscript have the following competing interests: [insert competing interests here]*

\* typeset

**Ethics Statement**

N/A

Enter an ethics statement for this submission. This statement is required if the study involved:

- Human participants
- Human specimens or tissue
- Vertebrate animals or cephalopods
- Vertebrate embryos or tissues
- Field research

Write "N/A" if the submission does not require an ethics statement.

General guidance is provided below. Consult the [submission guidelines](#) for detailed instructions. **Make sure that all information entered here is included in the Methods section of the manuscript.**

**Format for specific study types**

**Human Subject Research (involving human participants and/or tissue)**

- Give the name of the institutional review board or ethics committee that approved the study
- Include the approval number and/or a statement indicating approval of this research
- Indicate the form of consent obtained (written/oral) or the reason that consent was not obtained (e.g. the data were analyzed anonymously)

**Animal Research (involving vertebrate animals, embryos or tissues)**

- Provide the name of the Institutional Animal Care and Use Committee (IACUC) or other relevant ethics board that reviewed the study protocol, and indicate whether they approved this research or granted a formal waiver of ethical approval
- Include an approval number if one was obtained
- If the study involved *non-human primates*, add *additional details* about animal welfare and steps taken to ameliorate suffering
- If anesthesia, euthanasia, or any kind of animal sacrifice is part of the study, include briefly which substances and/or methods were applied

**Field Research**

Include the following details if this study involves the collection of plant, animal, or other materials from a natural setting:

- Field permit number
- Name of the institution or relevant body that granted permission

**Data Availability**

Authors are required to make all data underlying the findings described fully available, without restriction, and from the time of publication. PLOS allows rare exceptions to address legal and ethical concerns. See the [PLOS Data Policy](#) and [FAQ](#) for detailed information.

Yes - all data are fully available without restriction

A Data Availability Statement describing where the data can be found is required at submission. Your answers to this question constitute the Data Availability Statement and **will be published in the article**, if accepted.

**Important:** Stating 'data available on request from the author' is not sufficient. If your data are only available upon request, select 'No' for the first question and explain your exceptional situation in the text box.

Do the authors confirm that all data underlying the findings described in their manuscript are fully available without restriction?

**Describe where the data may be found in full sentences. If you are copying our sample text, replace any instances of XXX with the appropriate details.**

- If the data are **held or will be held in a public repository**, include URLs, accession numbers or DOIs. If this information will only be available after acceptance, indicate this by ticking the box below. For example: *All XXX files are available from the XXX database (accession number(s) XXX, XXX).*
- If the data are all contained **within the manuscript and/or Supporting Information files**, enter the following:  
*All relevant data are within the manuscript and its Supporting Information files.*
- If neither of these applies but you are able to provide **details of access elsewhere**, with or without limitations, please do so. For example:

*Data cannot be shared publicly because of [XXX]. Data are available from the XXX Institutional Data Access / Ethics Committee (contact via XXX) for researchers who meet the criteria for access to confidential data.*

*The data underlying the results presented in the study are available from (include the name of the third party*

All relevant data are within the manuscript and its Supporting Information files.

|                                                                                                                                                                                                                                         |                                                                                                                                                                                  |
|-----------------------------------------------------------------------------------------------------------------------------------------------------------------------------------------------------------------------------------------|----------------------------------------------------------------------------------------------------------------------------------------------------------------------------------|
| <p><i>and contact information or URL).</i></p> <ul style="list-style-type: none"><li>• This text is appropriate if the data are owned by a third party and authors do not have permission to share the data.</li></ul> <p>* typeset</p> |                                                                                                                                                                                  |
| Additional data availability information:                                                                                                                                                                                               | Tick here if the URLs/accession numbers/DOIs will be available only after acceptance of the manuscript for publication so that we can ensure their inclusion before publication. |

# 1 **Plastic and textile marine litter as reservoirs for secondary** 2 **species dispersal from ports.**

3  
4 **Aitor Ibabe\***, Fernando Rayón, Jose Luis Martínez, Eva Garcia-Vazquez.

5  
6 \*Corresponding author

7 E-mail: [ibabeaitor@gmail.com](mailto:ibabeaitor@gmail.com)

8  
9 Address: Department of Functional Biology, University of Oviedo. C/ Julian Claveria  
10 s/n. 33006-Oviedo, Spain.

## 11 12 **Abstract**

13  
14 Marine debris is nowadays an important source of environmental and economic  
15 problems. Floating litter can be employed by marine organisms as a surface to attach  
16 and use as spreading vector. In this way, human activities are promoting expansions of  
17 potentially harmful species into novel ecosystems, putting in danger the autochthonous  
18 communities. In this project, more than 1,000 litter items were collected and classified  
19 from five beaches eastwards the port of Gijon, in Asturias, Spain. Next generation  
20 sequencing was employed to study the communities occurring in biofilm attached to  
21 items of different materials. A dominance of DNA from Florideophyceans,  
22 Dinophyceans and Arthropods was found, and four non-indigenous species were  
23 identified. Results showed a clear preference of Florideophyceans and Bryozoans to  
24 attach on textile surfaces versus plastic ones. Considering that these taxa contain several  
25 highly invasive species described to date, these data emphasize the potential of textile  
26 marine debris as a vector for dispersal of alien species. Moreover, the litter macrofauna  
27 profile was more similar with port's macrofauna in closer beaches than in farther ones,  
28 confirming that both plastic and textile marine litter can be a vector for species dispersal  
29 from ports.

30  
31  
32 **Keywords:** Marine debris; Biofilm; Next generation sequencing; Nonindigenous  
33 species

## 34 Introduction

35

36 Human activities are triggering environmental changes all over the world since the  
37 beginning of intensive production methods. Activities such as agriculture, fisheries or  
38 industry are overexploiting the natural resources and this has led to a situation where  
39 species extinction rates have become 100 to 1000 times higher than the ones before  
40 human domination [1]. A huge amount of the waste produced from this excessive  
41 human activity is ending up in the ocean, altering marine ecosystems. These materials  
42 are known as marine debris or marine litter. This problem has led to a difficult  
43 situation, not only for the conservation of marine ecosystems, but also for human  
44 health and economic activities. Plastic litter that is floating in the oceans is an  
45 important cause of mortality for many animals such as marine mammals, seabirds or  
46 turtles, either because they ingest it [2-3] and/or get entangled [4-6]. In addition,  
47 marine litter causes important economic losses in industries such as fisheries, because  
48 of the time spent cleaning the debris from nets, and net losses. As an example, marine  
49 plastics cost an average of between \$15 million and \$17 million per year to the Scottish  
50 fishing industry [7]. Tourism can also suffer negative impacts due to the presence of  
51 marine litter on the coasts, which can affect the public perception of the quality of the  
52 surrounding environment leading to a loss of income for this sector [8].

53 Regarding other types of potential threats caused by marine debris, its role as a  
54 dispersal vector by invasive organisms is a fact of special concern [9]. Marine litter  
55 promotes the establishment and dispersal of non-native species. It can provide surface  
56 for colonizing species, facilitating their spread to new habitats [10]. Newly entered  
57 colonizers can alter the local ecosystem affecting the native organisms in several ways,  
58 from competition with or predation on native species to habitat alteration to  
59 transmission of exotic diseases to local species [11-13]. In addition to the impacts on  
60 local biodiversity, non-indigenous species have also severe impacts on the economy.  
61 For example, in the United States, more than \$138 billion per year are used to control  
62 new colonizers, or to avoid infections of non-indigenous diseases [14]. Aquaculture  
63 industries are also affected by invasive species that can alter the productivity, as in the  
64 case of *Caulerpa taxifolia* which forms dense mats [15], or *Carcinus maenas* which  
65 consumes native commercially important clams in Tasmania [16].



66 Identifying the biota that arrives in the local ecosystem is the only way to detect alien  
67 species and control invasions. However, quite often invaders are spread in an early  
68 ontogenetic stage (e.g. eggs, larvae or algae propagules) and they are not visually  
69 identifiable, thus non-indigenous individuals may remain undetected until they are  
70 already adults and start reproducing and expanding [17-18]. Exhaustive monitoring is  
71 needed, with low probabilities of finding non-established alien species due to their low  
72 density [19-20]. Identification based on organism morphology requires expert  
73 taxonomists specialized on the taxa to be analyzed, and often (especially in early  
74 development stages) identification cannot be done to a species level, limiting it to  
75 higher groups such as genus or family, which would not be useful for non-indigenous  
76 species identifications [21].

77 Nowadays, new techniques have been developed and species identification can be done  
78 based on sequencing and analysing nucleic acids extracted from environmental samples  
79 [22], also called environmental DNA or RNA (eDNA, eRNA). Metabarcoding is a  
80 well-established method for the detection of non-indigenous species and for biosecurity  
81 applications [23-26]. In fact, techniques based on eDNA are advantageous when  
82 detecting species with low densities (such as alien species at their arrival and before  
83 establishing), as very low DNA concentrations may be enough to find a species when  
84 the individuals are still very scarce and/or small [27-28].

85 Predicting invasions requires understanding the process of the invasion [29-30]; it is  
86 therefore crucial to understand how marine debris is spread, and to study the organisms  
87 with the capacity of attaching to these surfaces. There are solid studies about marine  
88 plastics and their capacity to carry invasive species [31-38]; however, to our  
89 knowledge no studies have been done some types of litter surfaces, for example textile  
90 litter, as a vector. Ports being identified as potential donors of both marine litter and  
91 invasive species studies of biota dispersing on different types of marine litter near ports  
92 seem to be necessary to predict how much invasive biota can be dispersed using this  
93 vector.

94 In this study, biota attached to litter items **of different materials** was characterized using  
95 next generation sequencing on DNA extracted from the biofilm, to analyze the  
96 composition of the communities inhabiting the marine debris. The biofilm of about  
97 1.5% of surface of the litter objects collected from beaches within 20 km distance from  
98 Port of Gijon (central south Bay of Biscay, Spain), where several exotic and invasive

99 species have been reported [39], was sampled. The relationship between the fauna  
100 inventoried in the port and the one found on litter objects nearby was explored.

101

## 102 **Material and methods**

103

### 104 **Sampling**

105

106 Five beaches located at the east of Gijon port (central south Bay of Biscay) were  
107 selected for litter sampling: Arbeyal, El Rinconin, Peñarrubia, Cagonera and La Ñora  
108 (Fig. 1). Being Gijón port a potential donor of marine invasive species, the reason for  
109 this location is that the dominant currents go eastwards in this coast during the winter  
110 [40], that was the sampling time of this study.

111

112 **Fig. 1** Map showing the location in the northern Spanish coast of the five beaches  
113 sampled

114

115 From the 13<sup>th</sup> to the 17<sup>th</sup> of January 2017, litter items were collected from the five  
116 beaches. Sampling was carried out around the lowest diurnal tide (starting 2 hours  
117 before and ending 2 hours after) in order to increase the beach surface available to  
118 sample. All pieces bigger than 5 cm<sup>2</sup> were collected and their surface was estimated.  
119 They were classified in situ in different types: sanitary pads, textiles, plastic bags,  
120 plastic bottles, expanded polystyrene (EPS) fragments, fishing gear, and others.  
121 Immediately after classification, the items or item fragments representing  
122 approximately 0.25% of the total litter surface, representative of the litter profile in each  
123 beach, were collected and stored in ethanol for further biofilm sampling and extraction  
124 of environmental DNA.

125

### 126 **Taxonomy**

127

128 For the names of the species we followed the taxonomic nomenclature from the World  
129 Register of Marine Species [41]. Regarding the status of the species detected visually

130 and from DNA, exotic and invasive species were identified from the European Network  
131 on Invasive Alien Species database NOBANIS [42].

132

### 133 **Environmental DNA extraction and metabarcoding**

134

135 Sterile swabs and gauzes were employed to take out the attached biofilm from the litter  
136 by scratching the surface. Sterile DNA/RNA free distilled water was used to rinse and  
137 clean the surface. After the biofilm was recovered from the litter, the cotton extremes of  
138 the swabs were cut and collected with the gauzes in 15ml Falcon tubes with the water  
139 that was also employed to take out the biofilm. Then they were macerated for 2 minutes  
140 using a Stomacher 80 biomaster (Seward, UK). A negative control was prepared for this  
141 whole procedure, by using sterile swab and gauze extremes and suspending them into  
142 Sterile DNA/RNA free distilled water. Once the Stomacher finished, liquid excess was  
143 squeezed from the rests of swabs and gauzes and the suspension was pelleted by  
144 centrifugation (3000 x g 15 min) following the procedure reported by Pochon et al.  
145 (2015) [43]. The supernatant was discarded and then DNA was extracted from the pellet  
146 using an E.Z.N.A® Soil DNA Kit (Omega Bio-tek, USA) following the manufacturer's  
147 instructions.

148

149 The primers mICOIntF and jgHCO2198 [44] were employed to amplify a fragment of  
150 ≈300bp within the COI gene (miniCOI). Both primers were modified to include the  
151 specific sequences needed for Ion PGM libraries. A single common forward primer was  
152 used. Reverse primers were modified to include barcodes for each of the samples, so  
153 that 16 different barcoded reverse primers were used. Each barcode has a known  
154 sequence to identify the samples after the whole process. Before sequencing, the  
155 quantity and quality of the DNA from PCR products was measured using Bioanalyzer  
156 (Agilent technologies). The PCR reactions were performed using negative controls to  
157 monitor possible contamination. Thermocycling conditions were: 1x: 95°C for 5 min;  
158 35x: 95°C for 1 min, 48°C for 1 min and 72°C for 1 min; 1x: 72°C for 5 min and 4°C  
159 on hold. The amplicons were analysed directly in the platform Ion Torrent PGM  
160 (ThermoFisher Scientific, USA), in the Unit of DNA Analysis of the Scientific &  
161 Technical Services of the University of Oviedo.

162

### 163 **Bioinformatics pipeline for analysis of NGS data**

164  
165 Bioinformatics analyses were performed using QIIME, an open-source bioinformatics  
166 pipeline [45]. Firstly, an initial screening was carried out in order to select reliable  
167 sequences, with a quality value > 20 and a length >200 bp. This was performed using the  
168 script `split_libraries.py`. For taxonomic assignment, the following script was used:  
169 `assign_taxonomy.py`. Instead of using the whole GenBank as a reference, a specific  
170 database containing only eukaryotic COI sequences was generated with the script  
171 `entrez.qiime` (Chris Baker. [ccmbaker@fas.harvard.edu](mailto:ccmbaker@fas.harvard.edu). Pierce Lab, Department of  
172 Organismic and Evolutionary Biology, Harvard University). An initial assignment was  
173 made considering a minimum identity of 97% and an E-value of  $1e^{-10}$ , as it was  
174 considered enough to obtain reliable species identification from COI barcodes [46]. In  
175 addition, assignments were also done employing minimum identity of 95% and E-value  
176 of  $1e^{-50}$ , to compare results. From the operational taxonomic unit (OTU) table obtained  
177 after the assignment, only marine and brackish taxa were retained for further statistical  
178 analysis.  
179 A subset of 50 sequences assigned to a species level from each parameter set were  
180 randomly taken from the OTU table. They were assigned manually against GenBank  
181 using NCBI's BLAST web browser at  
182 [https://blast.ncbi.nlm.nih.gov/Blast.cgi?PAGE\\_TYPE=BlastSearch](https://blast.ncbi.nlm.nih.gov/Blast.cgi?PAGE_TYPE=BlastSearch) (NCBI webpage,  
183 accessed July 2019), for double-checking the reliability of the taxonomic identification.

184

## 185 **Statistical analyses**

186

187 The statistical analysis was carried out with parametric or non-parametric tests done in  
188 PAST program [47] after checking normality in the dataset. For beach litter  
189 composition, the proportion of each type of debris was compared among beaches using  
190 non-parametric contingency Chi-square, confirmed from Monte Carlo procedure  
191 (n=9999 permutations). The litter composition was compared between pairs of beaches  
192 using Euclidean distance, and the results visualized in a plot constructed from non-  
193 metric multidimensional scaling (nmMDS) analysis after checking stress and  $r^2$  in a  
194 Shepard plot.

195

196 The DNA dataset was analyzed with the following variables: the number of species of  
197 each taxon, the total number of species, the proportion of exotic species over the total

198 number of species in each sample. Sequences assigned to terrestrial species,  
 199 environmental DNA and assignment artifacts were excluded from the analysis.  
 200 Comparisons of the average number of species on plastics (as plastic bags, plastic  
 201 bottles, buoys and expanded polystyrene) and textile objects (including sanitary pads  
 202 and fabric pieces) were done using non-parametric Mann-Whitney tests. The  
 203 community inferred from metabarcoding was compared between pairs of items using  
 204 Gower's general similarity coefficient for presence-absence of each species, and  
 205 nmMDS analysis was conducted as above. The same PAST software by Hammer et al.  
 206 (2001) was employed.

207

## 208 **Results**

209

### 210 **Beach litter**

211

212 Beach surface ranged from 2500 m<sup>2</sup> in El Rinconin to 17500 m<sup>2</sup> in La Ñora. A total of  
 213 1023 litter objects were found in the beaches, corresponding to densities between 1.26  
 214 and 4.57 items/m<sup>2</sup> in Arbeyal and Peñarrubia respectively (Table 1). Considering the  
 215 litter surface, it was between 2.46 cm<sup>2</sup> of litter per m<sup>2</sup> of beach in the cleanest Arbeyal to  
 216 18.6 in the most littered Peñarrubia (Table 1); for litter surface La Ñora joined the group  
 217 of more polluted beaches together with Peñarrubia and Rinconín, while for the number  
 218 of items it was closer to the least polluted Arbeyal and Cagonera.

219

220 **Table 1.** Characteristics of the beaches sampled from the central south Bay of Biscay.  
 221 Beach surface in m<sup>2</sup>. The litter density is given in surface as cm<sup>2</sup> of litter per m<sup>2</sup>, and as  
 222 litter items per m<sup>2</sup>.

|                          | <b>Arbeyal</b> | <b>Rinconín</b> | <b>Peñarrubia</b> | <b>Cagonera</b> | <b>La Ñora</b> |
|--------------------------|----------------|-----------------|-------------------|-----------------|----------------|
| Type of beach            | Urban          | Urban           | Rural             | Rural           | Rural          |
| Substrate                | Sand           | Sand            | Pebble            | Pebble          | Sand           |
| River                    | No             | No              | No                | No              | Yes            |
| Beach surface            | 14000          | 2500            | 8250              | 10625           | 17500          |
| Latitude                 | 43.5445N       | 43.5483N        | 43.5518N          | 43.5501N        | 43.5471N       |
| Longitude                | 5.6934W        | 5.6390W         | 5.6237W           | 5.6100W         | 5.5897W        |
| Litter density (surface) | 2.46           | 9.01            | 18.61             | 2.93            | 10.46          |
| Litter density (items)   | 1.26           | 4.20            | 4.57              | 1.29            | 1.30           |

223

224 The majority of litter was made of plastic (61.9%), 33.9% was textile (sanitary pads,  
225 clothes) and only 43 objects (4.2%) were of other materials. The five beaches were  
226 significantly different among each other for the type of litter (Chi-square = 837.94 with  
227 40 degrees of freedom and  $P = 6.31 \times 10^{-150}$ ; Monte Carlo  $P = 0.0001$ ). For example, in  
228 Cagonera there were more textile items, while in La Ñora the predominant litter was  
229 small plastic pieces (Fig. 2A). Abandoned, lost or otherwise discarded fishing gears  
230 (plastic ALDFG) were found in all the beaches except in Arbeyal (the urban beach closer  
231 to Gijón port). Metallic objects, like cans, were scarce. They were found only from  
232 Rinconin beach (Fig. 2A). Biota composition was quite different among beaches, being  
233 Peñarrubia and Cagonera beaches the most similar ones, mainly containing species  
234 belonging to classes Florideophyceae and Dinophyceae (Fig. 2B).

235

236 **Fig. 2** Litter (A) and biota (B) composition in the five beaches analyzed in this study,  
237 presented as proportion of each type of item (A) or proportion of species of each main  
238 taxonomic group (B).

239

240 The litter profile in the beach of Cagonera with so many sanitary pads can be explained  
241 from a punctual malfunctioning of the domestic wastewater treatment in the  
242 neighborhood. The neighbors were consulted about this and explained that the local  
243 wastewater treatment plant was temporarily closed and the toilets flushed directly to the  
244 beach. Thus, the large proportion of textile litter in that beach is likely not representative  
245 of the common beach state. Campaigns for not disposing this type of objects in toilets  
246 should be conducted in this area.

247

248 The nmMDS based on Euclidean distances had stress of 0,  $r^2$  of 0.865 and 0.002 for the  
249 axis 1 and 2 respectively. The beaches were grouped roughly by the abundance of textile  
250 versus plastics, being connected in the minimum spanning tree almost following the  
251 relative proportion of textile (Fig. 3A); the beaches richer in plastics (Rinconín and La  
252 Ñora) were more or less proximate and separate of the former, and Peñarrubia was apart  
253 (Fig. 3A).

254

255 **Fig. 3** Non-metric multidimensional scaling analysis of the litter composition (A) and the  
256 litter biofilm biota identified from DNA (B), in the five analyzed beaches. Scatter plots  
257 constructed from pairwise Gower distances. The minimum spanning tree is presented.

258

259 **Biota on litter items identified from Next Generation Sequencing**

260

261 The surfaces sampled for biofilm and their composition are presented in Table 1. In  
 262 total they corresponded to 16 types from the different beaches, accounting for  
 263 approximately 2.5‰ of the litter surface. Only biofilms from 12 samples (from the  
 264 initial 16 samples) provided DNA of quality to be successfully PCR-amplified and  
 265 sequenced (Table 2). Thus DNA sequences were not obtained from four expanded  
 266 polystyrene pieces. For the 12 remaining biofilm samples, nine were from plastic  
 267 objects and three were from textiles.

268

269 The initial screening left 278 124 sequences that were useful for species assignments, as  
 270 they passed the quality filter being >200bp and with a quality value >20 (Table 2).  
 271 Although the same DNA amount of each sample library was employed for next  
 272 generation sequencing, results were dissimilar, as for some samples much more  
 273 sequences were obtained than from others (Table 2). The polystyrene pieces from  
 274 Peñarrubia (P-P3) was the sample for which more sequences were obtained (> 90000),  
 275 while the plastic fragments from Cagonera (C-P4) provided the smallest number of  
 276 sequences. After OTU assignation 66% of the sequences in P-P3 were lost (still  
 277 remaining > 30000 sequences), and for the sample C-P4 none of the sequences assigned  
 278 to a species with the BLAST criteria employed. So finally, biofilm communities were  
 279 inferred from only 11 samples.

280

281 **Table 2.** Raw and filtered NGS results. Litter surfaces used for biofilm analyses,  
 282 concentration of eDNA as ng/μL, number of reads obtained before and after quality  
 283 filters, and number of sequences assigned taxonomically after the final BLAST.

| Beach   | Litter type          | Material | Code | eDNA concentration (ng/μL) | Before quality filter | After quality filter | After BLAST (%97, <E <sup>-50</sup> ) |
|---------|----------------------|----------|------|----------------------------|-----------------------|----------------------|---------------------------------------|
| La Ñora | Plastic Bottle       | Plastic  | Ñ-P1 | 2.66                       | 57596                 | 8476                 | 969                                   |
|         | Plastic Bag          | Plastic  | Ñ-P2 | 1.45                       | 110931                | 33004                | 3417                                  |
|         | Sanitary pad         | Textile  | Ñ-T1 | 2.09                       | 8024                  | 5915                 | 97                                    |
|         | Expanded polystyrene | Plastic  | Ñ-P3 | -                          | -                     | -                    | -                                     |

|            |                      |         |      |      |        |       |       |
|------------|----------------------|---------|------|------|--------|-------|-------|
|            | Plastic fragment     | Plastic | C-P4 | 1.88 | 1597   | 540   | 0     |
| Cagonera   | Fishing gear         | Plastic | C-P5 | 2.22 | 99716  | 38098 | 1379  |
|            | Sanitary pad         | Textile | C-T1 | 1.98 | 93725  | 38877 | 3137  |
|            | Expanded polystyrene | Plastic | C-P3 | -    | -      | -     | -     |
|            | Fabric piece         | Textile | P-T2 | 1.79 | 14414  | 8501  | 1193  |
| Peñarrubia | Expanded polystyrene | Plastic | P-P3 | 5.63 | 370143 | 91354 | 30241 |
|            | Plastic Bottle       | Plastic | P-P1 | 3.54 | 103369 | 24871 | 366   |
| Rinconín   | Buoy                 | Plastic | R-P5 | 2.09 | 88324  | 19754 | 53    |
|            | Expanded polystyrene | Plastic | R-P3 | -    | -      | -     | -     |
|            | Plastic Bag          | Plastic | A-P2 | 2.17 | 5332   | 707   | 81    |
| Arbeyal    | Plastic fragment     | Plastic | A-P4 | 3.45 | 21964  | 8027  | 131   |
|            | Expanded polystyrene | Plastic | A-P3 | -    | -      | -     | -     |

284

285 Species assignments made with a minimum identity of 90% and an E- value of  $1e^{-10}$   
286 retrieved many hits (S1 Table), but the reliability was too low because 82% of the  
287 manual individual BLAST did not assign the OTU to the same species. For  $> 97\%$   
288 identity with the same E- value of  $1e^{-10}$ , despite much fewer significant hits retrieved,  
289 still 45% of the sequences checked manually were assigned to a different species using  
290 manual BLAST. With a more stringent E-value of  $1e^{-50}$  and 90% identity, the number  
291 of discrepancies between QIIME pipeline and the manual BLAST individual  
292 assignments was 22%. Finally, with an E-value  $1e^{-50}$  and 95% identity all the putative  
293 species identified from QIIME coincided with those retrieved from manual BLAST.  
294 However, in order to increase the assignments to species level and not only to genus a  
295 minimum identity of 97% was chosen, being the final conditions for the metabarcoding  
296 assignments using QIIME a minimum identity of 97% and E-value of  $1e^{-50}$ . Although  
297 85% of the initial sequences were lost due to these highly stringent parameters the  
298 identifications obtained were very robust, as deduced from total coincidence with the  
299 manual BLAST.

300

301 After all the process, 122 species were identified from biofilm DNA in the litter  
302 biofilms sampled. *Homo sapiens* and other non-marine species were detected, such as  
303 insects, mammals and freshwater organisms but they were not considered for posterior  
304 analyses (S2 Table). Since we were working with debris like sanitary pads or plastic  
305 bottles, which are in contact with humans, we expected to obtain a lot of human



306 sequences. Potential contamination with human DNA throughout the processing of  
 307 samples can be discarded since no DNA amplification was detected in the negative  
 308 control. Insect species (especially Diptera) and big mammals like *Bos taurus* (cattle)  
 309 and *Sus scrofa* (wild boar) were found in rural beaches like Cagonera; likely runoffs  
 310 carried the environmental DNA from the land. In the case of insects there is also the  
 311 possibility that DNA belongs to eggs that adults laid on the debris.

312

313 Considering only marine and brackish taxa, 86 species classified into 17 major groups  
 314 were identified from the biofilm samples analyzed. The putative taxa were not equally  
 315 distributed in all the samples and beaches (Table 3). In fact, some items showed a  
 316 bigger amount of taxa than others. Sanitary pads from Cagonera (C-T1) provided more  
 317 species (44 species) than the rest. On the other hand, biofilm from plastic bags from  
 318 Arbeyal (A-P2) only appeared to have a Phaeophycean alga (*Petalonia fascia*).

319

320 **Table 3** Number of marine species of the main taxa obtained from each litter sample.

321 The same species may appear several times in different samples. Litter sample codes as

322 in Table 2.

| Taxon           | Sample |      |      |      |      |      |      |      |      |      |      |
|-----------------|--------|------|------|------|------|------|------|------|------|------|------|
|                 | A-P2   | Ñ-P2 | P-P1 | C-T1 | R-P5 | Ñ-P1 | C-P5 | A-P4 | P-T2 | Ñ-T1 | P-P3 |
| Polichaeta      | 0      | 0    | 0    | 1    | 0    | 0    | 0    | 0    | 1    | 0    | 1    |
| Arthropoda      | 0      | 2    | 1    | 5    | 0    | 2    | 1    | 1    | 1    | 0    | 3    |
| Apicomplexa     | 0      | 0    | 1    | 0    | 0    | 0    | 0    | 0    | 0    | 0    | 0    |
| Ascomycota      | 0      | 2    | 1    | 4    | 0    | 0    | 0    | 0    | 0    | 0    | 1    |
| Bacillariophyta | 0      | 0    | 0    | 1    | 1    | 0    | 0    | 1    | 1    | 0    | 0    |
| Bryozoa         | 0      | 0    | 0    | 1    | 0    | 0    | 0    | 1    | 2    | 2    | 0    |
| Chordata        | 0      | 0    | 0    | 2    | 0    | 0    | 0    | 0    | 0    | 0    | 0    |
| Cnidaria        | 0      | 0    | 0    | 4    | 1    | 0    | 0    | 0    | 0    | 0    | 1    |
| Echinodermata   | 0      | 0    | 0    | 2    | 0    | 0    | 0    | 0    | 0    | 0    | 0    |
| Mollusca        | 0      | 0    | 0    | 2    | 2    | 0    | 0    | 0    | 1    | 0    | 2    |
| Dynophyceae     | 0      | 0    | 0    | 10   | 0    | 0    | 2    | 0    | 0    | 0    | 10   |
| Florideophyceae | 0      | 0    | 0    | 7    | 1    | 0    | 8    | 0    | 6    | 4    | 1    |
| Amoebozoa       | 0      | 0    | 1    | 1    | 0    | 0    | 0    | 1    | 0    | 0    | 0    |
| Nemertea        | 0      | 1    | 0    | 1    | 0    | 1    | 0    | 0    | 1    | 0    | 3    |
| Phaeophyceae    | 1      | 0    | 0    | 0    | 0    | 0    | 0    | 2    | 1    | 0    | 1    |
| Porifera        | 0      | 1    | 0    | 3    | 0    | 0    | 0    | 0    | 0    | 0    | 0    |
| Bangiophyceae   | 0      | 0    | 0    | 0    | 1    | 0    | 0    | 0    | 0    | 0    | 0    |
| <b>Total</b>    | 1      | 6    | 4    | 44   | 6    | 3    | 11   | 6    | 14   | 6    | 23   |

323

324 The non-metric scaling analysis arranged the beaches from their biofilm biota in an  
325 order similar to that found from the litter items (Figs. 3A and 3B), with La Ñora,  
326 Rinconin and Arbeyal connected closer than Cagonera and finally Peñarrubia. This was  
327 connected with different types of biota found in biofilm from textile and from plastic  
328 litter. For example, more Florideophycean (red algae) species were found on textile  
329 samples than on plastic ones (13 species were found on textile samples and only 9 on  
330 plastic; Figures 4A and 4B). For Dinophyceans, more species were found on plastic  
331 litter (Figure 4A) than in textiles (Fig. 4B). Only one species of Bangiophyceans  
332 appeared, which was found on plastic from Rinconin beach. On the other hand, the two  
333 species of echinoderms and the DNA of two species of Chordata (two Perciformes) that  
334 were found, only appeared on textile litter.

335

336 **Fig. 4** Biota occurring in plastic (A, above) and textile (B, below) litter surfaces,  
337 determined from eDNA and NGS.

338

339 Textiles and plastics were compared for the number of species of each taxonomic group.  
340 Statistically significant differences between the two groups of litter items were found  
341 only for Bryozoans and Florideophyceae DNA from a significantly higher number of  
342 species of these taxa occurred on textile items than on plastic ones (Mann-Whitney U =  
343 0.5 with  $z = 2.764$ ,  $P = 0.006$ ; and  $U = 3$  with  $z = 2.062$ ,  $P = 0.03$ , for Bryozoans and red  
344 algae respectively). However, focusing only on the macrofauna profiles analyzed in  
345 previous studies in the region (i.e. number of species of the phyla Annelida, Arthropoda,  
346 Bryozoa, Chordata, Cnidaria, Echinoderma, Mollusca, Porifera published in Miralles et  
347 al. 2016), they were not significantly different between textile and plastic (Chi square =  
348 7.885, 6 d.f.,  $P = 0.247$ , and Fisher's exact test with  $P = 0.249 > 0.05$ , not significant).

349

350 DNA of three non-native species was found in the dataset, including two species that are  
351 nowadays considered invasive in the study region: the brown alga *Sargassum muticum*  
352 and the signal crayfish *Pacifastacus leniusculus* (Table 4). The two marine alien  
353 species were found on Peñarrubia beach, attached to polystyrene items. The polystyrene  
354 containing DNA traces of *Illex argentinus* was a fragment of a box typically employed  
355 to transport fishing products and was not considered further, since the origin of DNA  
356 was likely from catch of seafood remains and not true South American squid larvae. On  
357 the other hand, DNA assigned to the signal crayfish (*Pacifastacus leniusculus*), which is

358 from brackish or fresh waters, was found on biofilm from plastic bottle in La Ñora  
 359 beach near the river.

360

361 **Table 4. Non-indigenous and nuisance species which DNA was found attached to**  
 362 **beached litter objects; Shaded in gray, species native from the study region that have**  
 363 **been described as aliens or invasive elsewhere.**

| Taxon           | Species                         | Issue                               | Sample             | Reference |
|-----------------|---------------------------------|-------------------------------------|--------------------|-----------|
| Malacostraca    | <i>Pacifastacus leniusculus</i> | Invasive                            | Ñ-Plastic Bottle   | [48]      |
| Cephalopoda     | <i>Illex argentinus</i>         | Alien                               | P- Polystyrene     | [49]      |
| Phaeophyceae    | <i>Sargassum muticum</i>        | Invasive                            | P- Polystyrene     | [48]      |
| Apicomplexa     | <i>Isospora</i> sp.             | Human parasite                      | P- Plastic Bottle  | [50]      |
|                 |                                 |                                     | Ñ-Plastic Bag      | [51]      |
| Ascomycota      | <i>Cladosporium herbarum</i>    | Asthmatic outbreaks and allergies   | P- Polystyrene     | [51]      |
|                 |                                 |                                     | P- Polystyrene     | [51]      |
| Ascomycota      | <i>Penicillium digitatum</i>    | Rare pneumonia cases                | C- Sanitary pad    | [52]      |
| Ascomycota      | <i>Fusarium solani</i>          | Infection of human cornea           | C- Sanitary pad    | [53]      |
| Cnidaria        | <i>Muggiaea atlantica</i>       | Invasiveness reported in Germany    | C- Sanitary pad    | [54]      |
| Bivalvia        | <i>Mytilus edulis</i>           | Alien in the Black Sea              | C- Sanitary pad    | [55]      |
| Dynophyceae     | <i>Alexandrium catenella</i>    | Paralytic shellfish poisoning       | P- Polystyrene     | [56]      |
| Dynophyceae     | <i>Karenia brevis</i>           | Respiratory irritation              | C- Sanitary pad    | [56]      |
| Dynophyceae     | <i>Peridinium</i> sp.           | Toxic blooms                        | P- Polystyrene     | [56]      |
| Dynophyceae     | <i>Alexandrium ostenfeldii</i>  | Paralytic shellfish poisoning       | C- Sanitary pad    | [56]      |
| Dynophyceae     | <i>Karlodinium</i> sp.          | Toxic blooms                        | C- Sanitary pad    | [56]      |
| Dynophyceae     | <i>Alexandrium minutum</i>      | Toxic PSP blooms                    | C- Sanitary pad    | [56]      |
|                 |                                 |                                     | C-Fishing Gear     | [56]      |
| Dynophyceae     | <i>Alexandrium</i> sp.          | May produce toxic blooms            | P- Polystyrene     | [56]      |
| Dynophyceae     | <i>Azadinium poporum</i>        | Azaspiracid shellfish poisoning     | C- Sanitary pad    | [56]      |
| Dynophyceae     | <i>Prorocentrum micans</i>      | Shellfish killing blooms            | P- Polystyrene     | [57]      |
| Dynophyceae     | <i>Scrippsiella</i> sp.         | May produce high density blooms     | P- Polystyrene     | [58]      |
| Dynophyceae     | <i>Alexandrium affine</i>       | Alien in China, Ukraine, California | C-Fishing Gear     | [13]      |
| Florideophyceae | <i>Plocamium cartilagineum</i>  | Alien in the Mediterranean Sea      | C- Sanitary pad    | [13]      |
| Florideophyceae | <i>Ellisolandia elongata</i>    | Alien in the Belgian coast          | R-Buoy             | [59]      |
| Florideophyceae | <i>Jania rubens</i>             | Alien in the Mediterranean Sea      | P-Fabric piece     | [60]      |
| Florideophyceae | <i>Chondrus crispus</i>         | Alien in the United Kingdom         | C-Fishing Gear     | [61]      |
| Florideophyceae | <i>Gymnogongrus crenulatus</i>  | Alien in the Australian coast       | C-Fishing Gear     | [62]      |
| Phaeophyceae    | <i>Leathesia marina</i>         | Alien in the Mediterranean Sea      | A-Plastic fragment | [63]      |

364

365 Apart from these non-indigenous species, DNA from several native species was also  
 366 found attached to the litter. Many of these species are considered potentially harmful  
 367 because some strains can form toxic blooms (case of some dinoflagellate species), or  
 368 produce diseases or allergies (Table 4). Some species do not cause any known toxicity

369 or nuisance effects, but they are considered potentially dangerous in different places  
370 around the world where they are non-indigenous or even invasive species. We detected  
371 Florideophycean species such as *Plocamium cartilagineum*, *Jania rubens* (aliens in the  
372 Mediterranean Sea), *Chondrus crispus* (alien in the United Kingdom) and  
373 *Gymnogongrus crenulatus* (alien in the Australian coast); molluscs (*Mytilus edulis*;  
374 alien in the Black Sea); and cnidarians (*Muggiaea atlantica*; invasion reports in  
375 Germany).

376

### 377 **Litter as a vector for species dispersal from Gijon port**

378

379 For exploring the possibility of marine litter being a vector of dispersal from the ports,  
380 the taxonomic profiles found in this study from beach litter were compared with  
381 published data from the port of Gijon. The comparison was done using the subset of  
382 marine macroscopic animal species only, because only macroscopic sessile animals were  
383 sampled using a conventional approach in Miralles et al. (2016). A total of 24 species  
384 were published in the port [39] (S3 Table). The number of shared species across  
385 taxonomic groups found in litter biofilm in the five beaches and in the port was four out  
386 of a total of 44 macroscopic animal species, corresponding to the polychaetes  
387 *Platynereis dumerilii* and *Syllis gracilis*, the mussel *Mytilus edulis*, and the limpet  
388 *Patella vulgata*. For further analysis, the macrofaunal species fouling on litter (whatever  
389 litter type, since no significant differences were found between textile and plastic for  
390 macrofauna species profiles) were organized by proximity to the port, considering  
391 together the beaches located in the same bay -Arbeyal, Rinconin and Peñarrubia on one  
392 group, Cagonera and La Ñora on the other (see Fig. 1). The profile of the fouled  
393 macroscopic fauna of the port and the litter found on closer beaches was more similar to  
394 each other than the fauna of the litter found on farther beaches (Fig. 5). The macrofauna  
395 profile of Gijon port published by Miralles et al. (2016) was not significantly different  
396 of that found on litter from the three closer beaches (Chi square = 7.797, 5 d.f., P =  
397 0.168, and Fisher's exact test with P = 0.193). In contrast, the taxonomic profile of the  
398 litter macrofauna found from the farther La Ñora and Cagonera beaches was highly  
399 significantly different from the port fauna reported by Miralles et al. (2016) (Chi square  
400 = 27.051, 7 d.f., P = 0.0003, and Fisher's exact test with P = 1.91x10<sup>-5</sup>).

401

402 **Fig. 5** Proportion of species of different animal groups fouling Gijon old port piers and  
403 litter from beaches near (Litter - close) or apart (Litter - far) the port.  
404

## 405 **Discussion**

406  
407 Although based on a modest number of items, this study provided a number of results of  
408 importance in the field of environmental security. In the biofilm communities, as  
409 expected, some of the species detected from DNA are microscopic, such as amoebas or  
410 dinophytes. For the macroscopic species, the DNA was probably provided from free  
411 environmental DNA of macroscopic organisms, or microscopic **phases** (early larvae,  
412 eggs, **propagules**). The first result to be highlighted was DNA of a significantly higher  
413 number of red algae and bryozoan species found in textile debris than in plastic litter.  
414 Taking into account that both red algae [64-65], and bryozoans [66-67] contain a high  
415 proportion of invasive species, it seems that textile debris would have the potential to be  
416 a reservoir of potentially invasive species. Moreover, some of the species found in  
417 textile are dangerous for public health because they may cause red tides (e.g.  
418 *Alexandrium minutum*) or produce infections (e.g. *Fusarium solani*, *Cladosporium*  
419 *herbarum*), thus the role of textile litter as a reservoir of species should be carefully  
420 taken into account. Although fabric floatability is in principle lower than that of plastics,  
421 thus a priori having shorter dispersal capacity, in beaches with high litter accumulation  
422 the species accumulated in textile may pass on plastic items and eventually navigate  
423 offshore, live tides or storms occurring. Nowadays focused on massive plastic debris,  
424 future studies should consider also other types of litter –in addition to plastics- in order  
425 to fully understand the role of marine litter as reservoir and dispersal vector of nuisance  
426 species.

427  
428 Another interesting result was the higher similarity of litter macrofauna profile with  
429 port's macrofauna in closer beaches than in farther ones. This can be considered a signal  
430 of species dispersal from the port using marine litter as vectors. The macrofauna species  
431 found on litter from their DNA were all native or cosmopolitan, this suggesting that  
432 litter could not only transport alien species from Bay of Biscay ports [36], but also serve  
433 as a vector for the dispersal of native species, as it was found in Swedish waters [68].  
434

435 Moreover, some of the native species that were found attached to marine litter (mainly  
436 Florideophyceans) are considered alien or invasive in many other zones around the  
437 globe, so our results show that marine litter could be potentially dangerous in these  
438 areas, as it could be used as a spreading vector, facilitating alien species to reach and  
439 colonize new habitats.

440

441 Regarding local alien species, in the NGS results we detected DNA of several non-  
442 indigenous species, including an alga (*Sargassum muticum*), a cephalopod (*Illex*  
443 *argentinus*), and a freshwater crayfish (*Pacifastacus leniusculus*). Alien species tend to  
444 be very difficult to identify in the initial phases of colonization, as their population size  
445 is normally small. This is an important issue, because nonindigenous species eradication  
446 is easier in the first introduction stages when the population is not too big [69].

447 Sequences as those found in this study that occurred with low frequency should be  
448 taken into account, as they might be the key to anticipate or avoid possible future  
449 invasions. In this sense a deeper analysis is needed to interpret correctly the presence of  
450 DNA of exotic species on the particular litter objects analyzed in this study. The  
451 polystyrene piece sampled in Peñarrubia carried 39 DNA sequences of two alien species  
452 identified as *Illex argentinus* and *Sargassum muticum*. Individual BLASTs were made  
453 with some of the sequences belonging to *Illex argentinus* and confirmed that they were  
454 all correctly assigned. However, the Argentinean squid has no sessile larvae, and the  
455 species has never been detected in the Bay of Biscay. The origin of the polystyrene  
456 could explain this result; this material is employed in fishing vessels - polystyrene boxes  
457 are used to store the catch. Probably a polystyrene box used to store that squid ended on  
458 the sea and arrived in Peñarrubia beach, still containing rests of squid DNA in the  
459 biofilm.

460

461 In contrast with the former aliens, the other two are considered invasive in Spanish  
462 waters. *Sargassum muticum* is a brown seaweed that has been already detected in  
463 Asturias [70] and alters local biodiversity triggering the decline of some native species  
464 such as *Gelidium spinosum* [71]. Our results suggest small propagules of this species  
465 could be transported attached to marine litter, using it as a spreading vector to colonize  
466 new environments. On the other hand, the presence of DNA of the freshwater signal  
467 crayfish in a plastic bottle (household origin) from La Ñora beach can be easily  
468 explained. This beach is in the estuary of River La Ñora, and eggs, larvae or naked

469 DNA from freshwater organisms can arrive from the river, as rivers are conveyor belts  
470 of DNA diversity [72]. The species *Pacifastacus leniusculus* has been reported from  
471 River La Ñora [73] and our results are consistent with it, having a representation of the  
472 species living upstream.

473

474 On the technical side, next-generation sequencing was carried out from miniCOI  
475 amplicons in this study. COI is a largely studied gene, and big amount of sequences are  
476 available [74]. Reference databases for the 18S gene are currently growing and the gene  
477 has been incorporated for example in BOLD (Barcoding of Life Diversity) although  
478 more recently than COI, thus the number of reference sequences is still smaller for 18S  
479 gene [75]. For this reason, we based our study only on COI, that is today the most  
480 represented DNA barcode in public databases [76]. Although COI gene is not a marker of  
481 choice for algae identification, due to its low variability among plant species [77], in this  
482 work we obtained many algae sequences with a high reliability (minimum identity  
483 higher than 95% and e value  $<10^{-50}$ ). Many of them were randomly reviewed with  
484 individual BLAST and gave a robust assignment with  $>97\%$  identity and high scores, so  
485 our study aligns with other authors who found COI to be a good tool to sequence red  
486 algae such as Florideophyceae that we obtained here [78].

487

488 A problem for the use of Metabarcoding in biodiversity inventories is the unbalanced  
489 coverage of different taxonomic groups in current reference databases, especially in  
490 aquatic species [76]. Three biofilm sequences of a sanitary pad were assigned to  
491 *Squamamoeba japonica* (S1 Table). Its presence in coastal Bay of Biscay waters could  
492 be difficult to explain, because it is a deep-sea Pacific amoeba [79]. This could be an  
493 assignment artifact due to the scarcity of references because in July 2019 the only sea  
494 amoebas represented in GenBank with COI gene were of this species. It is possible that  
495 some DNA sequences of other marine amoebas were erroneously assigned to it.

496

497 A limitation of this study is that we cannot be sure if the individuals detected from  
498 DNA are alive or dead, that is, are or not able to start a real colonization of the  
499 surroundings of the litter items where they were found. DNA can persist extracellularly  
500 in the environment, making discrimination of living versus dead organisms difficult. In  
501 contrast, RNA molecules have a low durability in the environment, so a metabarcoding

502 approach using eDNA and eRNA may be used to differentiate between dead and alive  
503 organisms [80]. Further studies could use RNA instead of DNA molecules for species  
504 detection from marine litter.

505

## 506 **Conclusions and management recommendations**

507

508 In this study, species potentially dangerous for ecosystem and human health have been  
509 found from DNA analysis of biofilm fouling litter objects. Textile objects, although  
510 likely less mobile than plastic ones, carried a significantly higher proportion of nuisance  
511 species. On the other hand, the macrofauna profile of litter objects found on beaches  
512 seemed to be associated to the distance from the port, the closer the more similar. From  
513 these results, paying attention to textile litter objects would be recommended, in  
514 addition to the current concern about plastics and microplastics. Preventing litter  
515 dispersal from ports would be another important recommendation for avoiding exotic  
516 species spread.

517

## 518 **References**

- 519 1. Pimm, S. L., Russell, G. J., Gittleman, J. L., & Brooks, T. M. (1995). The future  
520 of biodiversity. *Science*, 269(5222), 347.
- 521 2. Moser, M. L., & Lee, D. S. (1992). A fourteen-year survey of plastic ingestion  
522 by western North Atlantic seabirds. *Colonial Waterbirds*, 83-94.
- 523 3. Bugoni, L., Krause, L., & Petry, M. V. (2001). Marine debris and human  
524 impacts on sea turtles in southern Brazil. *Marine Pollution Bulletin*, 42(12),  
525 1330-1334.
- 526 4. Mattlin, R. H., & Cawthorn, M. W. (1986). Marine debris—an international  
527 problem. *New Zealand Environment*, 51, 3-6.
- 528 5. Fowler, C. W. (1987). Marine debris and northern fur seals: a case study. *Marine*  
529 *Pollution Bulletin*, 18(6), 326-335.
- 530 6. Carr, A. (1987). Impact of nondegradable marine debris on the ecology and  
531 survival outlook of sea turtles. *Marine Pollution Bulletin*, 18(6), 352-356.
- 532 7. Mouat, J., Lozano, R. L., & Bateson, H. (2010). *Economic impacts of marine*  
533 *litter*. Kommunenes Internasjonale Miljøorganisasjon.



- 534 8. Jang, Y. C., Hong, S., Lee, J., Lee, M. J., & Shim, W. J. (2014). Estimation of  
535 lost tourism revenue in Geoje Island from the 2011 marine debris pollution  
536 event in South Korea. *Marine pollution bulletin*, 81(1), 49-54.
- 537 9. Rech, S., Borrell, Y., & García-Vazquez, E. (2016). Marine litter as a vector for  
538 non- native species: What we need to know. *Marine Pollution Bulletin*, 113(1),  
539 40-43.
- 540 10. Barnes, D. K. (2002). Biodiversity: invasions by marine life on plastic debris.  
541 *Nature*, 416(6883), 808-809.
- 542 11. Grassle, J. F., Lasserre, P., McIntyre, A. D., & Ray, G. C. (1991). Marine  
543 biodiversity and ecosystem function. *Biology International Special*, (23), 1-19.
- 544 12. Sakai, A. K., Allendorf, F. W., Holt, J. S., Lodge, D. M., Molofsky, J., With, K.  
545 A. et al. (2001). The population biology of invasive species. *Annual review of*  
546 *ecology and systematics*, 32(1), 305-332.
- 547 13. Molnar, J. L., Gamboa, R. L., Revenga, C., & Spalding, M. D. (2008). Assessing  
548 the global threat of invasive species to marine biodiversity. *Frontiers in Ecology*  
549 *and the Environment*, 6(9), 485-492.
- 550 14. Pimentel, D., Lach, L., Zuniga, R., & Morrison, D. (2000). Environmental and  
551 economic costs of nonindigenous species in the United States. *BioScience*,  
552 50(1), 53-65.
- 553 15. Verlaque, M. (1994). Checklist of introduced plants in the Mediterranean:  
554 Origins and impact on the environment and human activities. *Oceanologica*  
555 *acta*. Paris, 17(1), 1-23.
- 556 16. Walton, W. C., MacKinnon, C., Rodriguez, L. F., Proctor, C., & Ruiz, G. M.  
557 (2002). Effect of an invasive crab upon a marine fishery: green crab, *Carcinus*  
558 *maenas*, predation upon a venerid clam, *Katelysia scalarina*, in Tasmania  
559 (Australia). *Journal of Experimental Marine Biology and Ecology*, 272(2), 171-  
560 189.
- 561 17. Harvey, C. T., Qureshi, S. A., & MacIsaac, H. J. (2009). Detection of a  
562 colonizing, aquatic, non-indigenous species. *Diversity and Distributions*, 15(3),  
563 429-437.
- 564 18. Jerde, C. L., Mahon, A. R., Chadderton, W. L., & Lodge, D. M. (2011). "Sight-  
565 unseen" detection of rare aquatic species using environmental DNA.  
566 *Conservation Letters*, 4(2), 150-157.

- 567 19. MacKenzie, D. I. (2006). *Occupancy estimation and modeling: inferring*  
568 *patterns and dynamics of species occurrence*. Academic Press.
- 569 20. Dejean, T., Valentini, A., Miquel, C., Taberlet, P., Bellemain, E., & Miaud, C.  
570 (2012). Improved detection of an alien invasive species through environmental  
571 DNA barcoding: the example of the American bullfrog *Lithobates catesbeianus*.  
572 *Journal of applied ecology*, 49(4), 953-959.
- 573 21. Darling, J. A., & Blum, M. J. (2007). DNA-based methods for monitoring  
574 invasive species: a review and prospectus. *Biological Invasions*, 9(7), 751-765.
- 575 22. Sogin, M. L., Morrison, H. G., Huber, J. A., Welch, D. M., Huse, S. M., Neal,  
576 P. R. et al. (2006). Microbial diversity in the deep sea and the underexplored  
577 “rare biosphere”. *Proceedings of the National Academy of Sciences*, 103(32),  
578 12115-12120.
- 579 23. Andersson, A. F., Lindberg, M., Jakobsson, H., Bäckhed, F., Nyrén, P., &  
580 Engstrand, L. (2008). Comparative analysis of human gut microbiota by  
581 barcoded pyrosequencing. *PloS one*, 3(7), e2836.
- 582 24. Hajibabaei, M., Shokralla, S., Zhou, X., Singer, G. A., & Baird, D. J. (2011).  
583 Environmental barcoding: a next-generation sequencing approach for  
584 biomonitoring applications using river benthos. *PLoS one*, 6(4), e17497.
- 585 25. Somervuo, P., Yu, D. W., Xu, C. C., Ji, Y., Hultman, J., Wirta, H., &  
586 Ovaskainen, O. (2017). Quantifying uncertainty of taxonomic placement in  
587 DNA barcoding and metabarcoding. *Methods in Ecology and Evolution*, 8(4),  
588 398-407.
- 589 26. Hering, D., Borja, A., Jones, J. I., Pont, D., Boets, P., Bouchez, A. et al. (2018).  
590 Implementation options for DNA-based identification into ecological status  
591 assessment under the European Water Framework Directive. *Water research*.
- 592 27. Hulme, P. E. (2006). Beyond control: wider implications for the management of  
593 biological invasions. *Journal of Applied Ecology*, 43(5), 835-847.
- 594 28. Ficetola, G. F., Miaud, C., Pompanon, F., & Taberlet, P. (2008). Species  
595 detection using environmental DNA from water samples. *Biology letters*, 4(4),  
596 423-425.
- 597 29. Carlton, J. T. (1996). Pattern, process, and prediction in marine invasion  
598 ecology. *Biological conservation*, 78(1), 97-106.

- 599 30. Wonham, M. J., Walton, W. C., Ruiz, G. M., Frese, A. M., & Galil, B. S. (2001).  
600 Going to the source: role of the invasion pathway in determining potential  
601 invaders. *Marine Ecology Progress Series*, 215, 1-12.
- 602 31. Bravo, M., Astudillo, J.C., Lancellotti, D., Luna-Jorquera, G., Valdivia, N.,  
603 Thiel, M., (2011). Rafting on abiotic substrata: Properties of floating items and  
604 their influence on community succession. *Mar. Ecol. Prog. Ser.* 439, 1–17.
- 605 32. Carson, H.S., Nerheim, M.S., Carroll, K.A., Eriksen, M., 2013. The plastic-  
606 associated microorganisms of the North Pacific Gyre. *Marine Pollution Bulletin*.  
607 75, 126–32.
- 608 33. Zettler, E.R., Mincer, T.J., Amaral-Zettler, L.A., 2013. Life in the  
609 “plastisphere”: Microbial communities on plastic marine debris. *Environ. Sci.*  
610 *Technol.* 47, 7137–7146
- 611 34. Reisser J, Shaw J, Hallegraeff G, Proietti M, Barnes DKA, et al. (2014)  
612 Millimeter- Sized Marine Plastics: A New Pelagic Habitat for Microorganisms  
613 and Invertebrates. PLoS ONE 9(6): e100289. doi:10.1371/journal.pone.0100289
- 614 35. Kiessling, T., Gutow, L., Thiel, M. (2015). Marine litter as habitat and dispersal  
615 vector, in: In: Bergmann M., Gutow L., Klages M. (eds) *Marine Anthropogenic*  
616 *Litter*. Springer, Cham. pp. 141–180.
- 617 36. Miralles L., Gomez-Agenjo M, Rayon-Viña F, Gyraite G, Garcia-Vazquez E.  
618 (2018) Alert calling in port areas: marine litter as possible secondary dispersal  
619 vector for hitchhiking invasive species. *Journal for Nature Conservation* 42: 12-  
620 18
- 621 37. Rech S, Borrell YJ, Garcia-Vazquez E. (2018) Anthropogenic marine litter  
622 composition in coastal areas may be a predictor of potentially invasive rafting  
623 fauna. PLoS ONE 13(1): e0191859.
- 624 38. Winston, J. E., Gregory, M. R., & Stevens, L. M. (1997). Encrusters, epibionts,  
625 and other biota associated with pelagic plastics: a review of biogeographical,  
626 environmental, and conservation issues. In *Marine Debris* (pp. 81-97). Springer  
627 *New York*.
- 628 39. Miralles, L., Ardura, A., Arias, A., Borrell, Y. J., Clusa, L., Dopico, E., ... &  
629 Valiente, A. G. (2016). Barcodes of marine invertebrates from north Iberian  
630 ports: Native diversity and resistance to biological invasions. *Marine pollution*  
631 *bulletin*, 112(1-2), 183-188.

- 632 40. Botas JA, Fernandez E, Bode A, Anadon R (1989). Water masses off the Central  
633 Cantabrian Coast. *Scientia Marina*, 53(4), 755-761.
- 634 41. Appeltans W, Bouchet P, Boxshall GA, Fauchald K, Gordon DP, Hoeksema  
635 BW, Poore GC, Van Soest RW, Stöhr S, Walter TC, Costello MJ. (2012). World  
636 register of marine species. *Accessed online: <http://www.marinespecies.org>*  
637 *(accessed on 24 May 2017)*.
- 638 42. Nehring, S. (2006). NOBANIS–Invasive alien species fact sheet. *From: Online*  
639 *Database of the North European and Baltic Network on Invasive Alien Species-*  
640 *NOBANIS [www.nobanis.org](http://www.nobanis.org), (accessed on 24 May 2017)*.
- 641 43. Pochon, X., Zaiko, A., Hopkins, G. A., Banks, J. C., & Wood, S. A. (2015).  
642 Early detection of eukaryotic communities from marine biofilm using high-  
643 throughput sequencing: an assessment of different sampling devices.  
644 *Biofouling*, 31(3), 241-251.
- 645 44. Leray, M., Yang, J. Y., Meyer, C. P., Mills, S. C., Agudelo, N., Ranwez, V., ...  
646 & Machida, R. J. (2013). A new versatile primer set targeting a short fragment  
647 of the mitochondrial COI region for metabarcoding metazoan diversity:  
648 application for characterizing coral reef fish gut contents. *Frontiers in zoology*,  
649 10(1), 34.
- 650 45. Caporaso JG, Kuczynski J, Stombaugh J, Bittinger K, Bushman FD, Costello  
651 EK, Fierer N, Pena AG, Goodrich JK, Gordon JI, Huttley GA. (2010). QIIME  
652 allows analysis of high-throughput community sequencing data. *Nature*  
653 *methods*, 7(5), 335.
- 654 46. Hebert, P. D., Ratnasingham, S., & De Waard, J. R. (2003). Barcoding animal  
655 life: cytochrome c oxidase subunit 1 divergences among closely related  
656 species. *Proceedings of the Royal Society of London. Series B: Biological*  
657 *Sciences*, 270(suppl\_1), S96-S99.
- 658 47. Hammer, Ø., Harper, D. A. T., & Ryan, P. D. (2001). PAST: Paleontological  
659 Statistics Software Package for Education and Data Analysis.[Computer  
660 program] *Palaeontología Electrónica*. Accessed online: [http://palaeoelectronica.org/2001\\_1/past/issue1\\_01.htm](http://palaeoelectronica.org/2001_1/past/issue1_01.htm) (accessed on 26 May 2017).
- 661  
662 48. Autoridad Portuaria de Gijón. (2017). El Puerto de Gijón - Autoridad Portuaria  
663 de Gijón. [online] Available at: <https://www.puertogijon.es/puerto/> [Accessed 25  
664 May 2018].

- 665 49. Van der Land, J. (ed). (2008). UNESCO-IOC Register of Marine Organisms  
666 (URMO).
- 667 50. Lindsay, D. S., Dubey, J. P., & Blagburn, B. L. (1997). Biology of Isospora spp.  
668 from humans, nonhuman primates, and domestic animals. *Clinical Microbiology*  
669 *Reviews*, 10(1), 19-34.
- 670 51. Breitenbach, M., & Simon-Nobbe, B. (2002). The allergens of *Cladosporium*  
671 *herbarum* and *Alternaria alternata*. In *Fungal allergy and pathogenicity* (Vol. 81,  
672 pp. 48-72). Karger Publishers.
- 673 52. Oshikata, C., Tsurikisawa, N., Saito, A., Watanabe, M., Kamata, Y., Tanaka, M.  
674 et al. (2013). Fatal pneumonia caused by *Penicillium digitatum*: a case report.  
675 *BMC pulmonary medicine*, 13(1), 16.
- 676 53. Howard, D. H. (Ed.). (2002). *Pathogenic fungi in humans and animals*. CRC  
677 Press.
- 678 54. Greve, W. (1994). The 1989 german bight invasion of *muggiaea atlantica*. *ICES*  
679 *Journal of Marine Science*, 51(4), 355-358.
- 680 55. Alexandrov, B., & Berlinsky, N. (2004). Basic biological investigations of  
681 Odessa maritime port (August-December, 2001): final report. *GloBallast*  
682 *Monograph Series*, (7).
- 683 56. Moestrup, Ø.; Akselmann, R.; Fraga, S.; Hoppenrath, M.; Iwataki, M.;  
684 Komárek, J.; Larsen, J.; Lundholm, N.; Zingone, A. (Eds) (2009 onwards). IOC-  
685 UNESCO Taxonomic Reference List of Harmful Micro Algae. Accessed on  
686 2018-12-13 at <http://www.marinespecies.org/hab> .
- 687 57. Faust, M. A., & Gullede, R. A. (2002). Identifying harmful marine  
688 dinoflagellates. *Contributions from the United States national herbarium*, 42.
- 689 58. Gárate-Lizárraga, I., Band-Schmidt, C. J., López-Cortés, D. J., & Muñetón-  
690 Gómez, M. D. S. (2009). Bloom of *Scrippsiella trochoidea* (Gonyaulacaceae) in  
691 a shrimp pond in the southwestern Gulf of California, Mexico. *Marine pollution*  
692 *bulletin*, 58(1), 145-149.
- 693 59. GRIIS. (2016). The Global Register of Introduced and Invasive Species. IUCN  
694 SSC Invasive Species Specialist Group.
- 695 60. Verlaque, M. (2001). Checklist of the macroalgae of Thau Lagoon (Hérault,  
696 France), a hot spot of marine species introduction in Europe. *Oceanologica*  
697 *Acta*. 24(1): 29-49.

- 698 61. Guiry, M. D. (2014). The seaweed site: information on marine algae. *Seaweed*.  
699 *ie*.
- 700 62. Sliwa, C.; Migus, S.; McEnnulty, F.; Hayes, K. R. (2009). Marine Bioinvasions  
701 in Australia. *Biological Invasions in Marine Ecosystems*. pp. 425-437.
- 702 63. Boudouresque, C. F.; Verlaque, M. (2002). Biological pollution in the  
703 Mediterranean Sea: invasive versus introduced macrophytes. *Marine Pollution*  
704 *Bulletin*. 44(1): 32-38.
- 705 64. Nyberg, C. D., & Wallentinus, I. (2005). Can species traits be used to predict  
706 marine macroalgal introductions? *Biological Invasions*, 7(2), 265-279.
- 707 65. Williams, S. L., & Smith, J. E. (2007). A global review of the distribution,  
708 taxonomy, and impacts of introduced seaweeds. *Annu. Rev. Ecol. Evol. Syst.*,  
709 38, 327-359.
- 710 66. Watts, P. C., Thorpe, J. P., & Taylor, P. D. (1998). Natural and anthropogenic  
711 dispersal mechanisms in the marine environment: a study using cheilostome  
712 Bryozoa. *Philosophical Transactions of the Royal Society of London B:*  
713 *Biological Sciences*, 353(1367), 453-464.
- 714 67. Dyrinda, P. E. J., Fairall, V. R., Occhipinti Ambrogi, A., & d'Hondt, J. L.  
715 (2000). The distribution, origins and taxonomy of *Tricellaria inopinata* d'Hondt  
716 and Occhipinti Ambrogi, 1985, an invasive bryozoan new to the Atlantic.  
717 *Journal of Natural History*, 34(10), 1993-2006.
- 718 68. Garcia-Vazquez E, Cani A, Diem A, Ferreira C, Geldhof R, Marquez L, Molloy  
719 E, Perché S. (2018) Leave no traces – Beached marine litter shelters both  
720 invasive and native species. *Marine Pollution Bulletin* 131 Part A: 314-322.
- 721 69. Bax, N., Carlton, J. T., Mathews-Amos, A., Haedrich, R. L., Howarth, F. G.,  
722 Purcell, J. E., ... & Gray, A. (2001). The control of biological invasions in the  
723 world's oceans. *Conservation Biology*, 15(5), 1234-1246.
- 724 70. Fernández, C., Gutiérrez, L. M., & Rico, J. M. (1990). Ecology of *Sargassum*  
725 *muticum* on the north coast of Spain. Preliminary observations. *Botanica*  
726 *marina*, 33(5), 423-428.
- 727 71. Sanchez, I., Fernández, C., & Arrontes, J. (2005). Long term changes in the  
728 structure of intertidal assemblages after invasion by *Sargassum muticum*  
729 (Phaeophyta) 1. *Journal of Phycology*, 41(5), 942-949.

- 730 72. Deiner, K., Fronhofer, E. A., Mächler, E., Walser, J. C., & Altermatt, F. (2016).  
731 Environmental DNA reveals that rivers are conveyor belts of biodiversity  
732 information. *Nature communications*, 7, 12544.
- 733 73. Ayuntamiento de Gijón. (2016). Sendas verdes por el concejo de Gijón. [online]  
734 Available at: <https://www.gijon.es> [Accessed 28 May 2018].
- 735 74. Ratnasingham, S., & Hebert, P. D. (2007). BOLD: The Barcode of Life Data  
736 System (<http://www.barcodinglife.org>). *Molecular Ecology Resources*, 7(3),  
737 355-364.
- 738 75. Bucklin, A., Steinke, D., & Blanco-Bercial, L. (2011). DNA barcoding of  
739 marine metazoa. *Annual Review of Marine Science*, 3, 471-508.
- 740 76. Weigand A., Beermann A.J., Čiampor F., Costa F.O., Csabai Z., Duarte S., et  
741 al. (2019) DNA barcode reference libraries for the monitoring of aquatic biota  
742 in Europe: Gap-analysis and recommendations for future work. *Science of The*  
743 *Total Environment* 678, 499-524.
- 744 77. Robba, L., Russell, S. J., Barker, G. L., & Brodie, J. (2006). Assessing the use of  
745 the mitochondrial cox1 marker for use in DNA barcoding of red algae  
746 (Rhodophyta). *American journal of botany*, 93(8), 1101-1108.
- 747 78. Saunders, G. W. (2005). Applying DNA barcoding to red macroalgae: a  
748 preliminary appraisal holds promise for future applications. *Philosophical*  
749 *transactions of the Royal Society B: Biological sciences*, 360(1462), 1879-1888.
- 750 79. Kudryavtsev, A.; Pawlowski J. (2013). Squamamoeba japonica (Amoebozoa): a  
751 deep-sea amoeba from the Sea of Japan with a novel cell coat structure. *Protist*,  
752 164(1), 13-23.
- 753 80. Pochon, X., Zaiko, A., Fletcher, L. M., Laroche, O., & Wood, S. A. (2017).  
754 Wanted dead or alive? Using metabarcoding of environmental DNA and RNA  
755 to distinguish living assemblages for biosecurity applications. *PloS one*, 12(11),  
756 e0187636.

757

## 758 **Supporting information**

759

760 **S1 Table.** Number of sequences assigned to a species level with different BLAST  
761 criteria. Beach acronyms stand as A, C, Ñ, P and R for Arbeyal, Cagonera, Ñora,  
762 Peñarrubia and Rinconin respectively.

763 **S2 Table.** Number of sequences assigned to each species in the biofilm samples  
764 analyzed.  
765 **S3 Table.** Macroscopic animal species found from conventional sampling in Gijón port  
766 (Miralles et al. 2016) and from eDNA and NGS on litter biofilms in Gijón beaches.



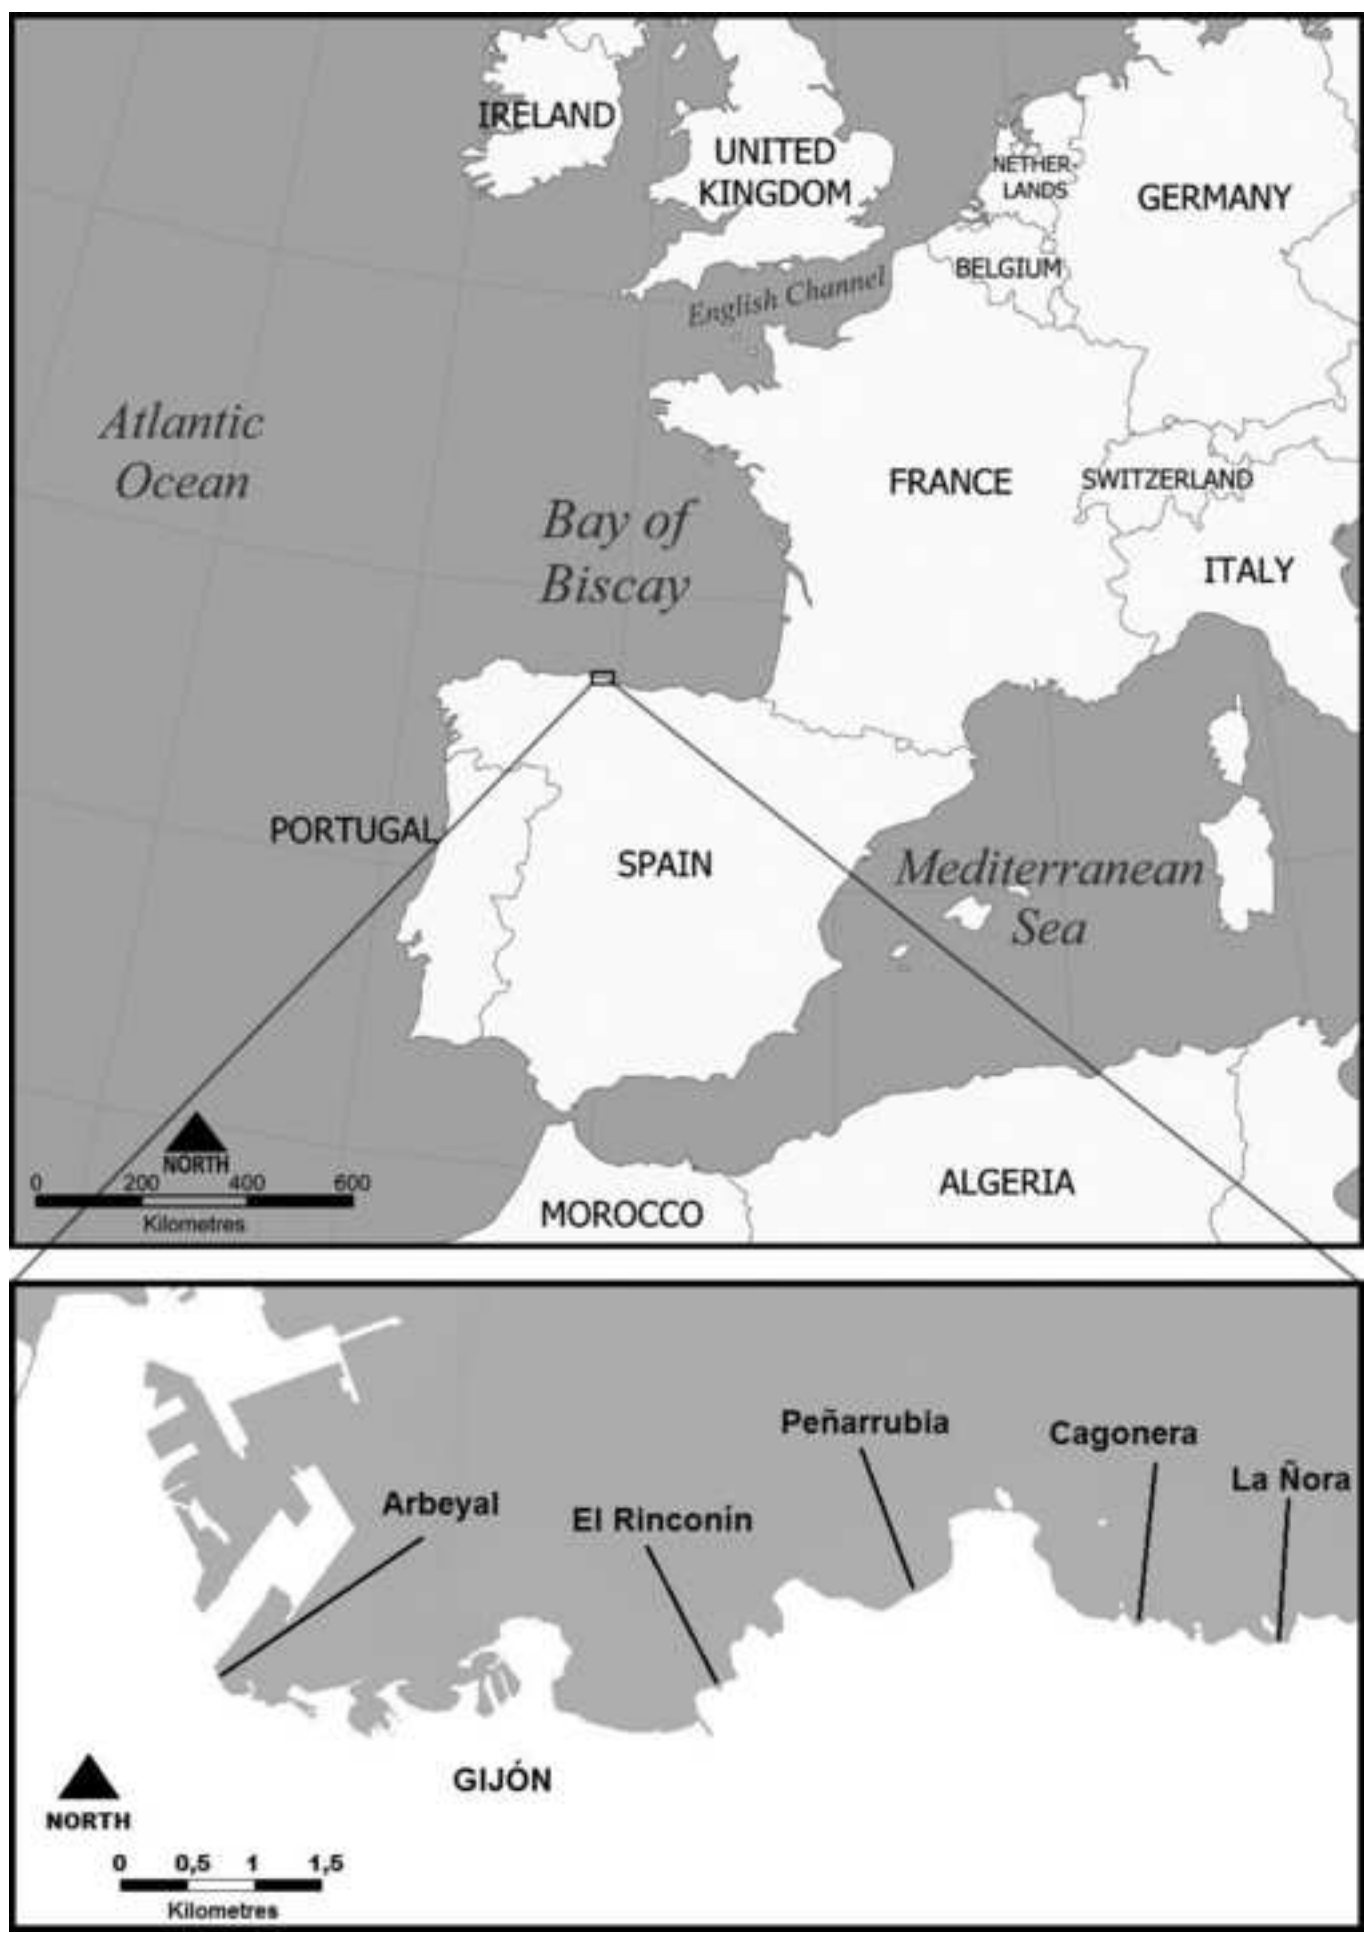

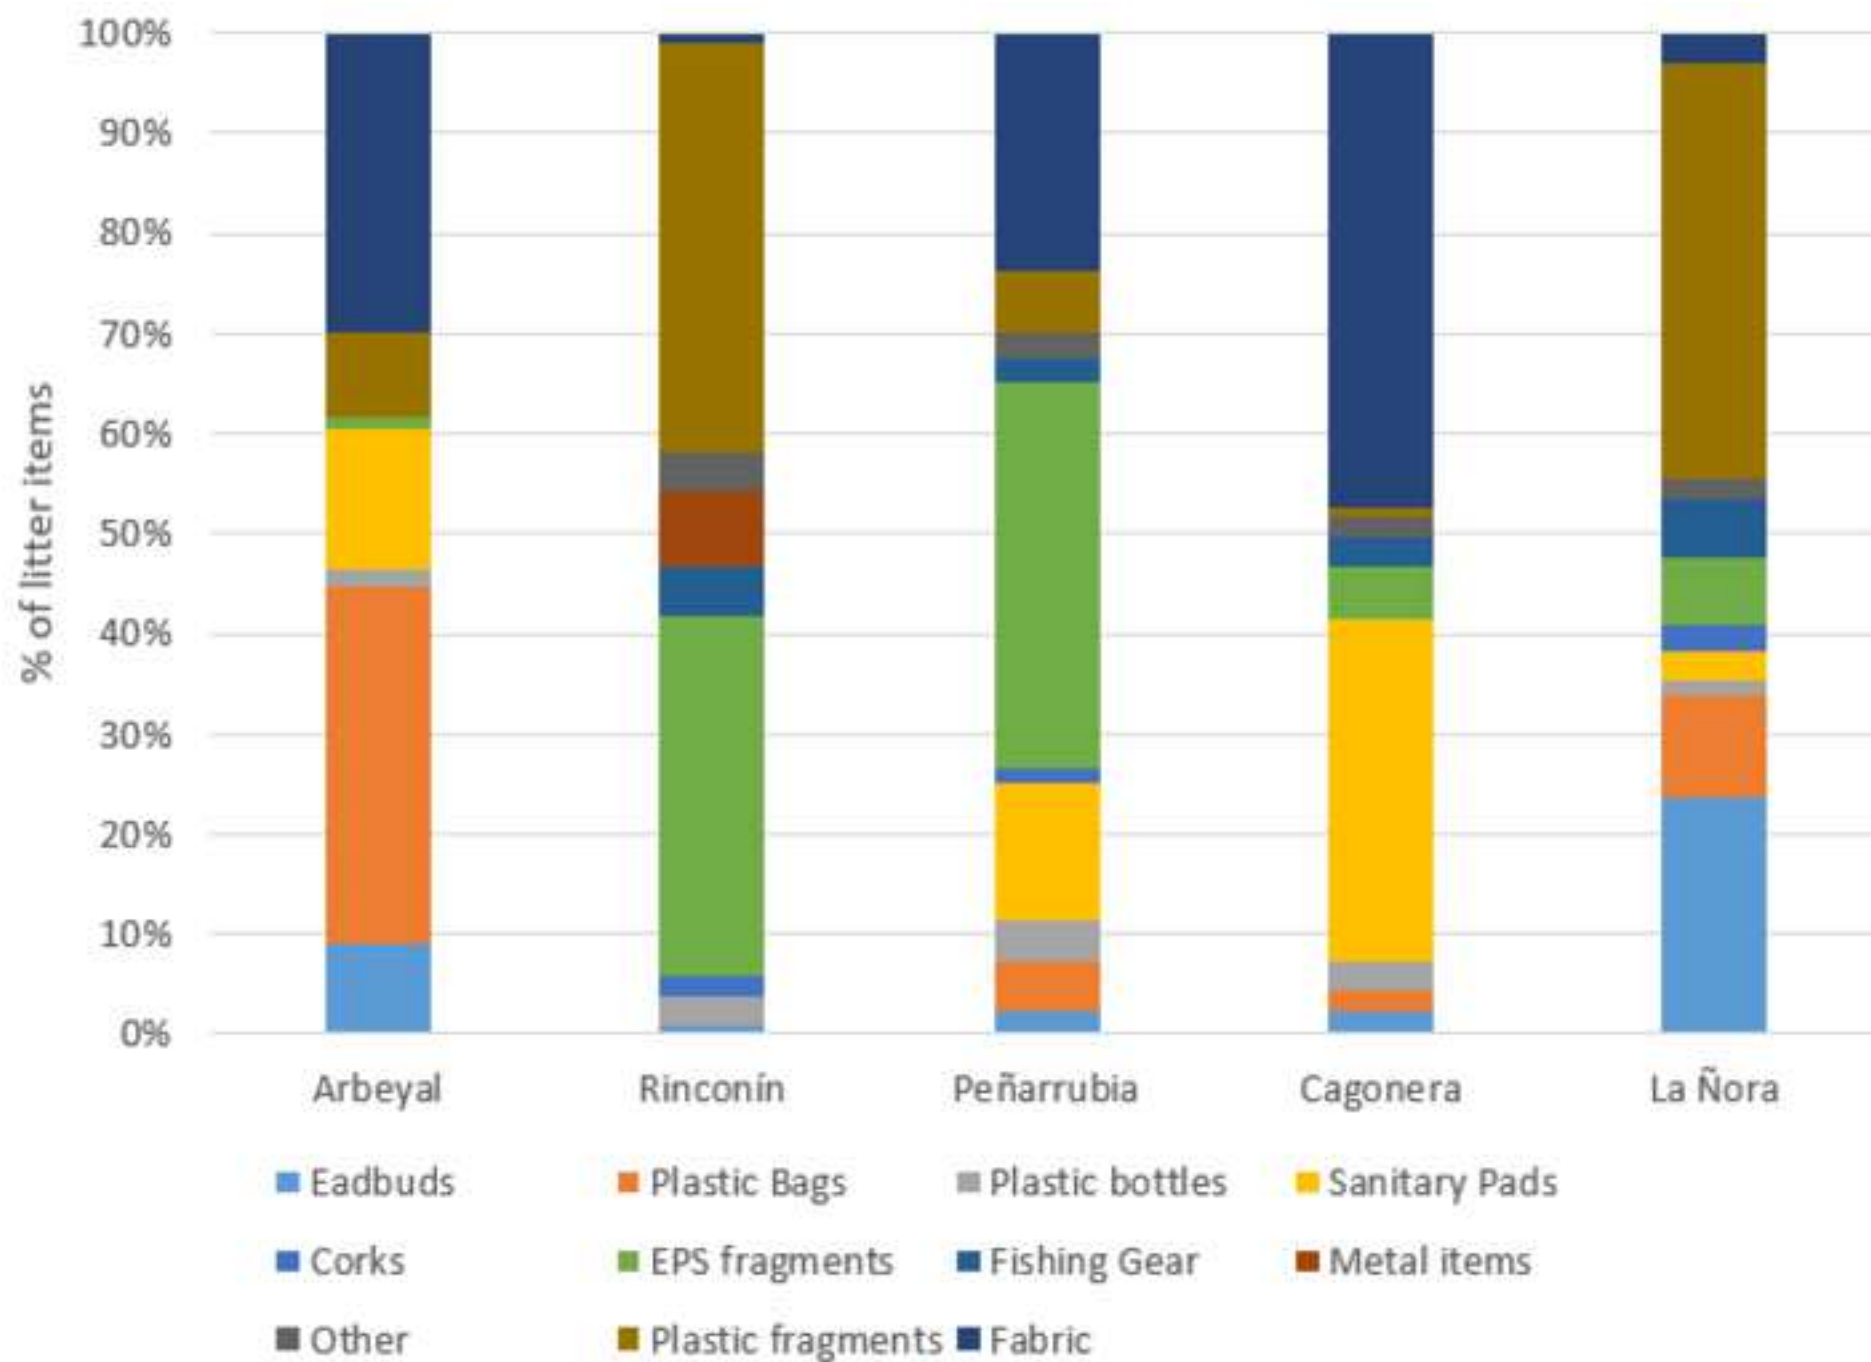



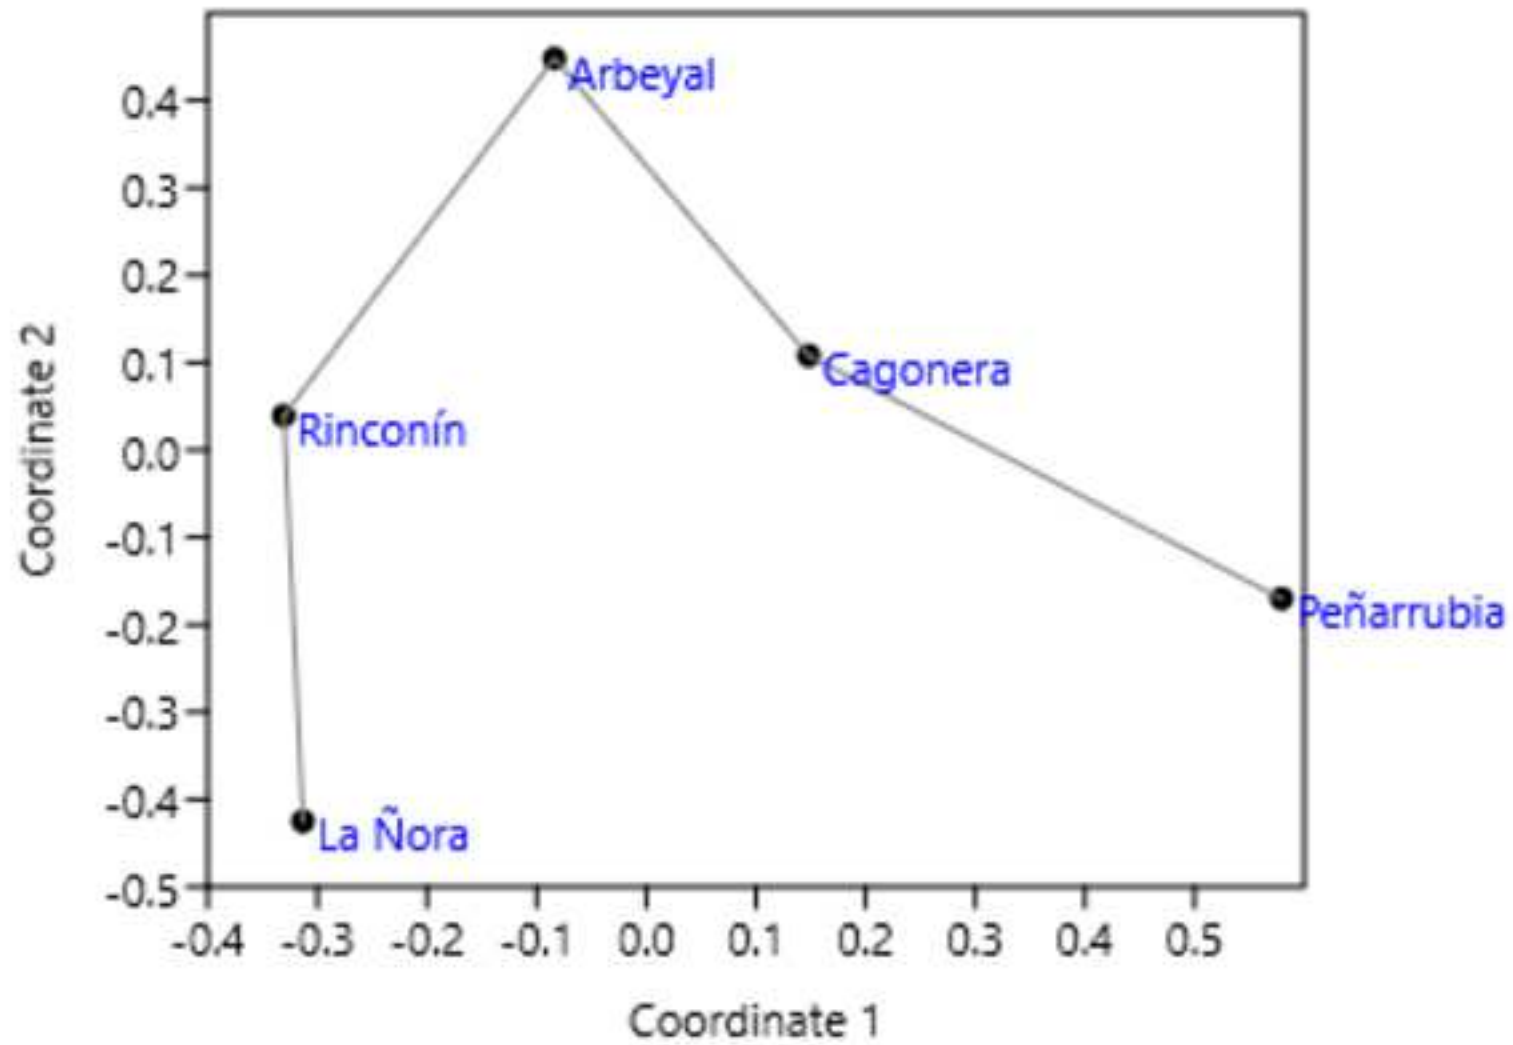

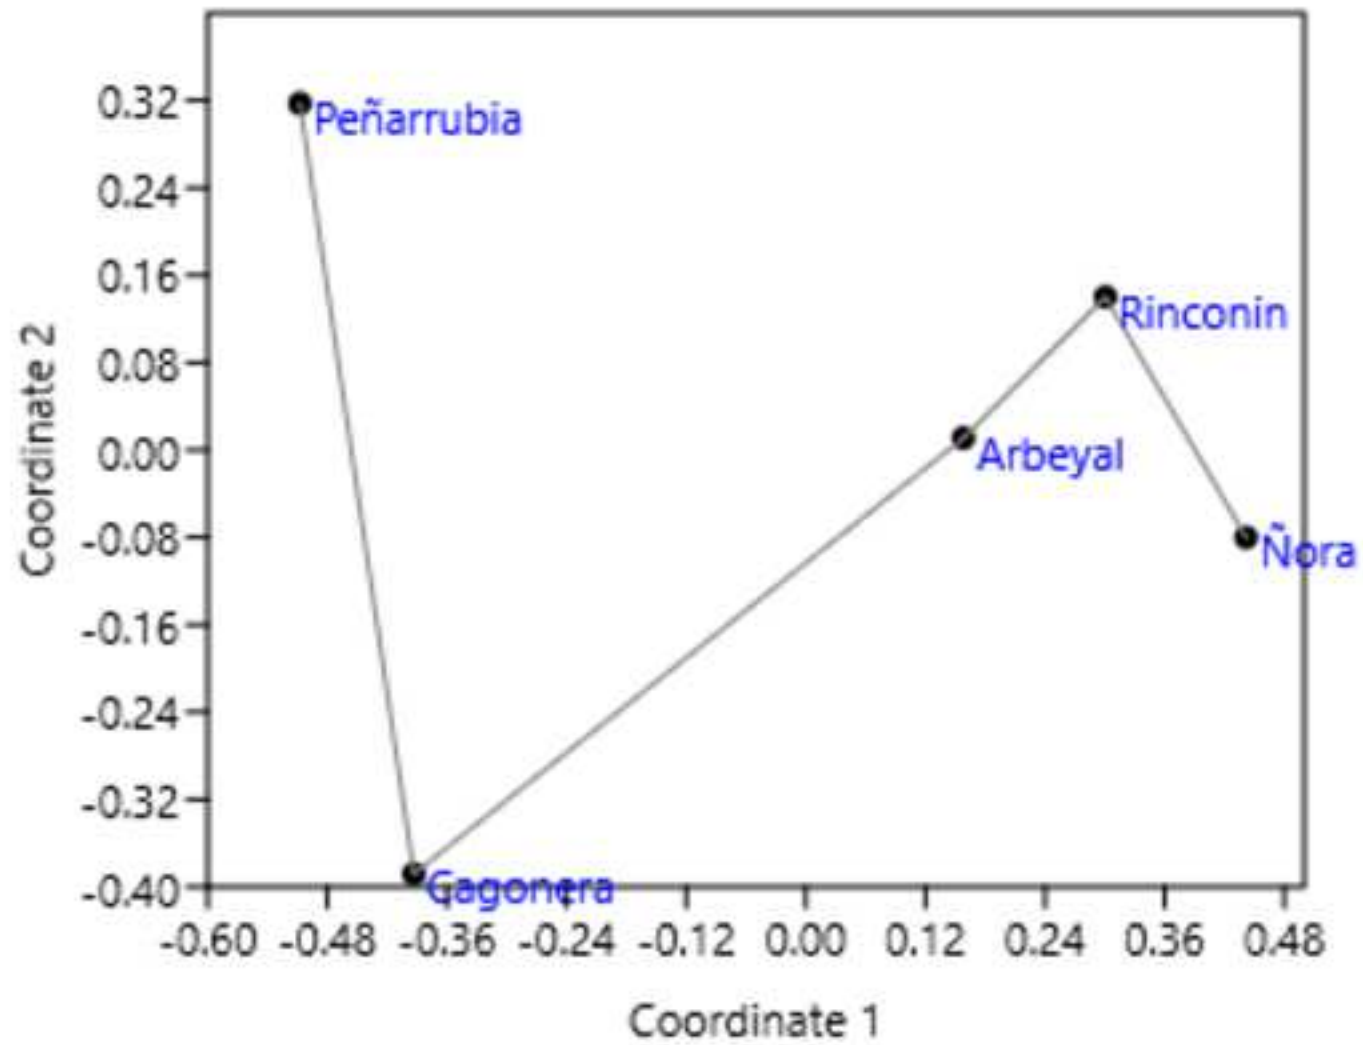

# Plastic

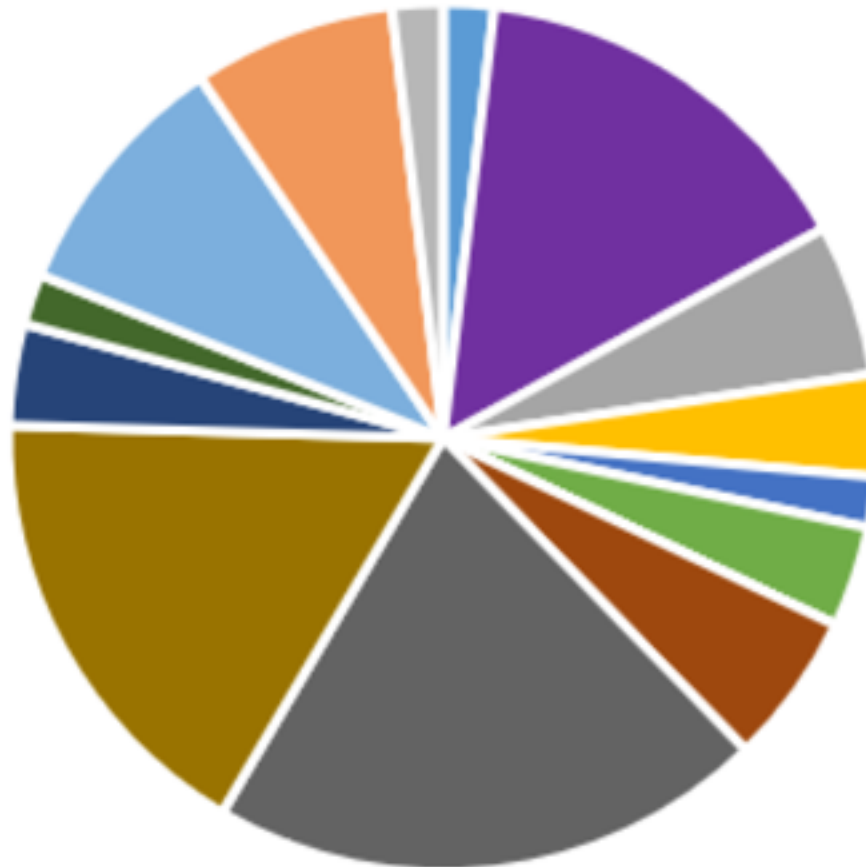

- |                   |                 |               |
|-------------------|-----------------|---------------|
| ■ Annelida        | ■ Arthropoda    | ■ Ascomycota  |
| ■ Bacillariophyta | ■ Bryozoa       | ■ Cnidaria    |
| ■ Echinodermata   | ■ Mollusca      | ■ Dinophyceae |
| ■ Florideophyceae | ■ Bangiophyceae | ■ Amoebas     |
| ■ Nemertea        | ■ Phaeophyceae  | ■ Porifera    |

# Textile

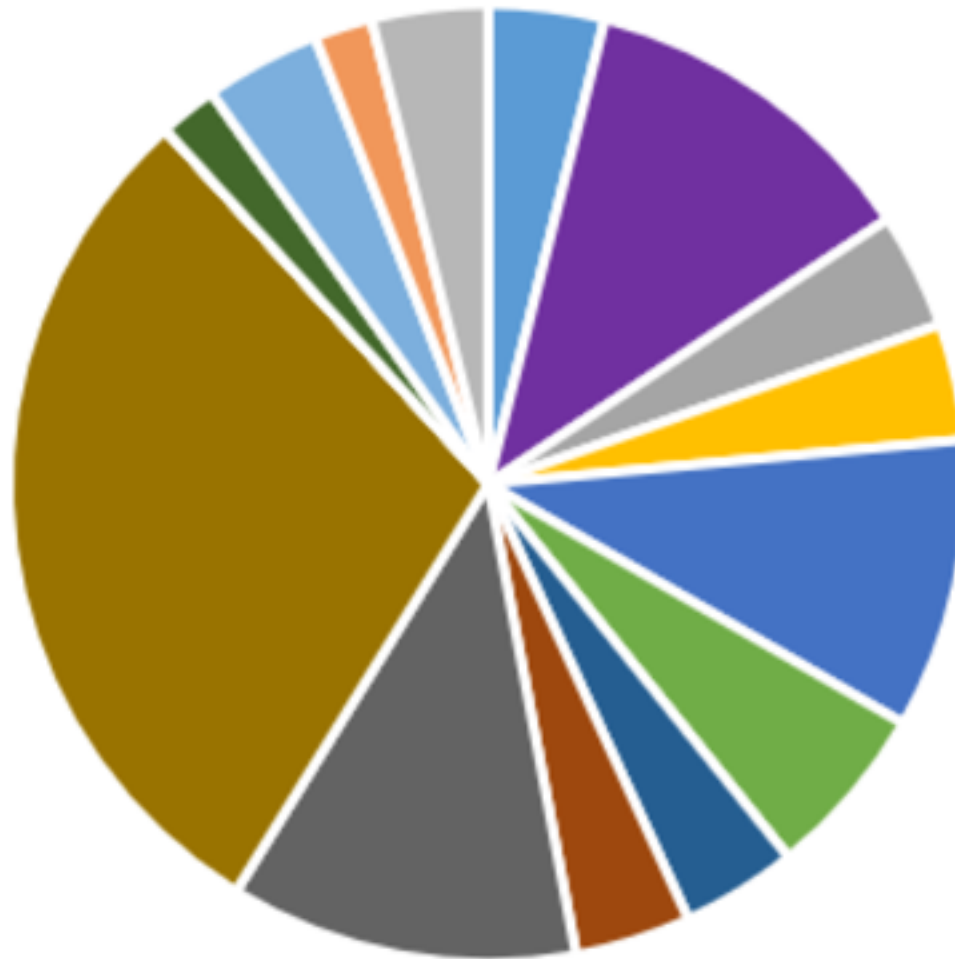

- |                   |                 |               |
|-------------------|-----------------|---------------|
| ■ Annelida        | ■ Arthropoda    | ■ Ascomycota  |
| ■ Bacillariophyta | ■ Bryozoa       | ■ Cnidaria    |
| ■ Echinodermata   | ■ Mollusca      | ■ Dinophyceae |
| ■ Florideophyceae | ■ Bangiophyceae | ■ Amoebas     |
| ■ Nemertea        | ■ Phaeophyceae  | ■ Porifera    |

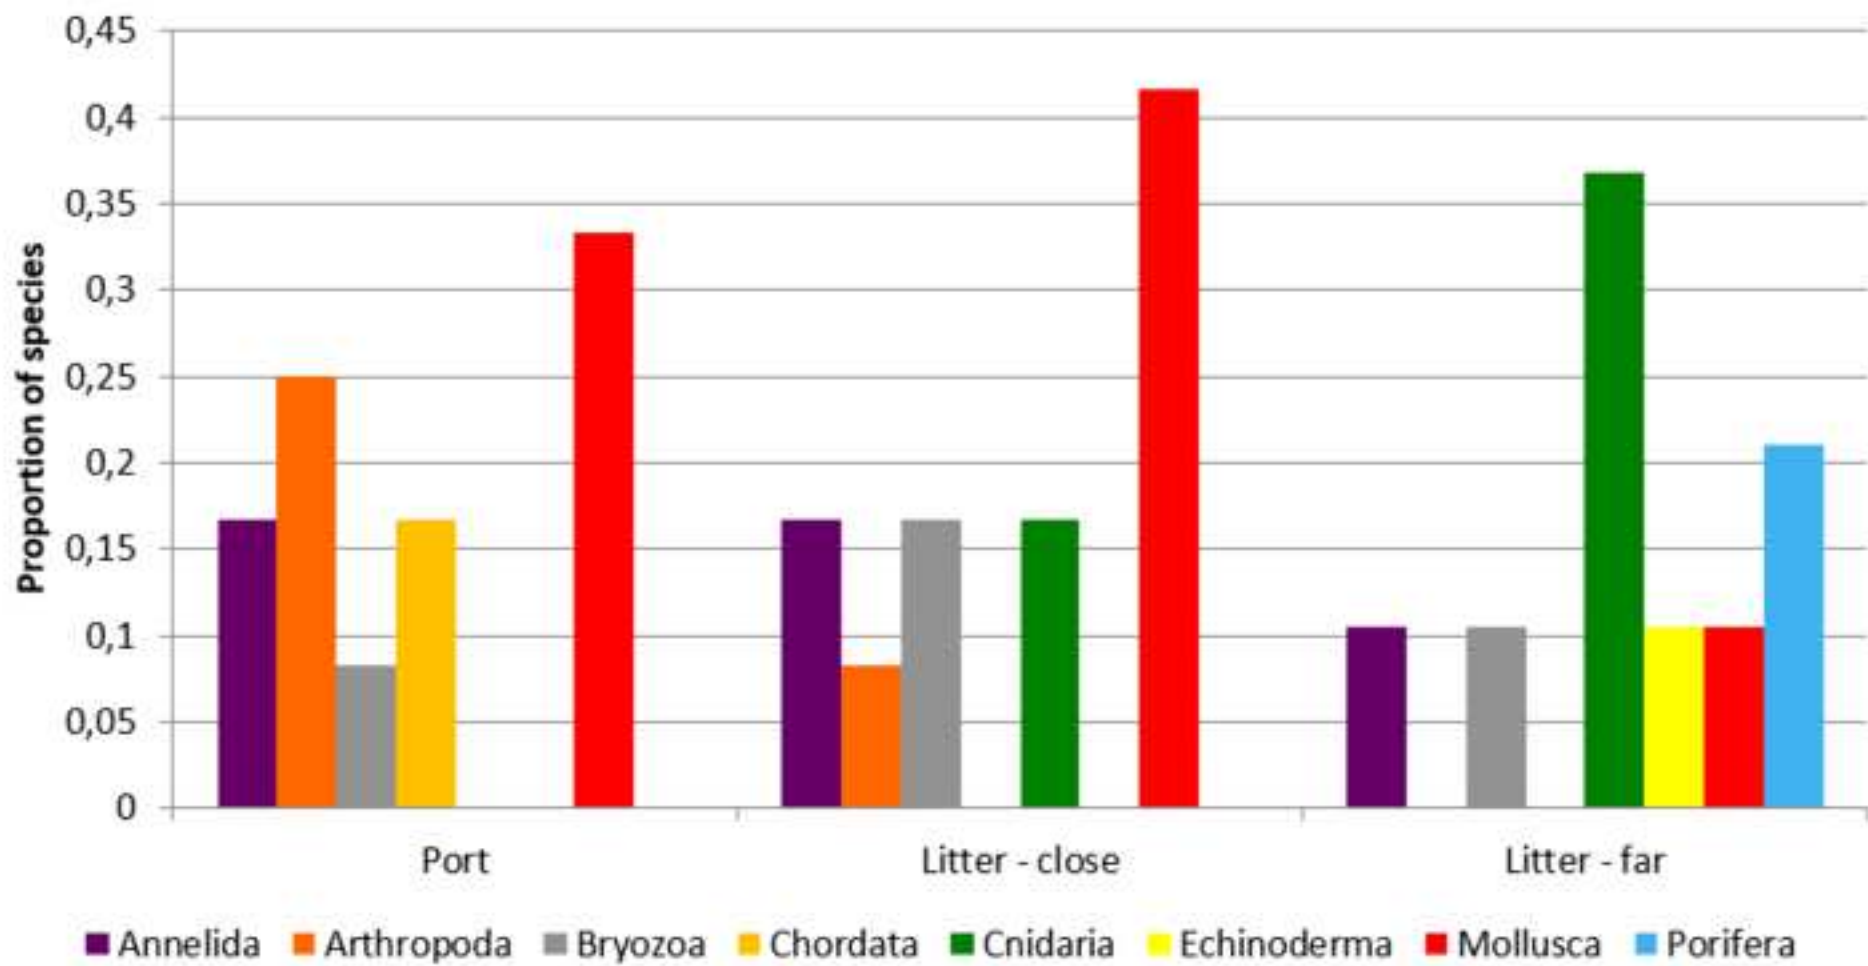



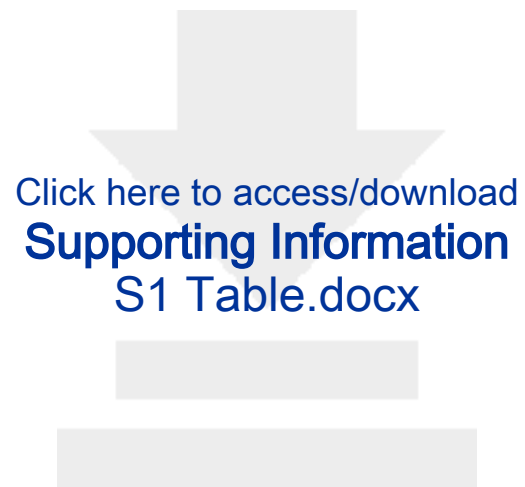

Click here to access/download  
**Supporting Information**  
S1 Table.docx

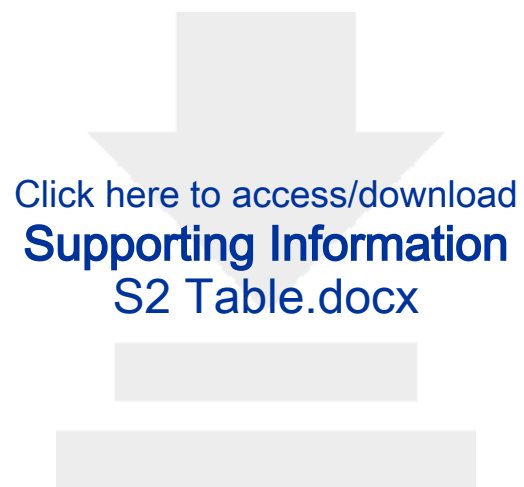

Click here to access/download  
**Supporting Information**  
S2 Table.docx

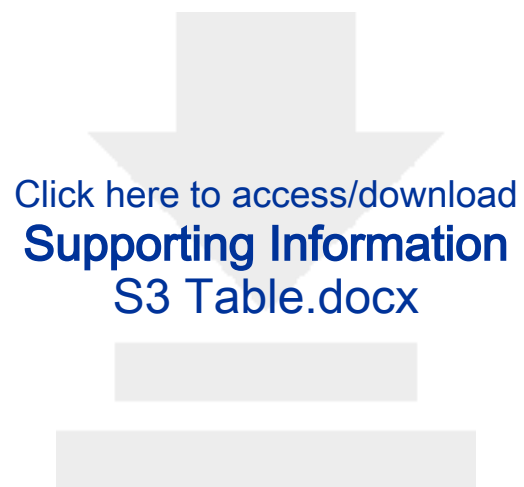

Click here to access/download  
**Supporting Information**  
S3 Table.docx
